# 1 A chemical tool for improved culture of human pluripotent stem cells

2 Laurence Silpa<sup>1</sup>, Maximilian Schuessler<sup>1</sup>, Gu Liu<sup>2</sup>, Marcus Olivecrona<sup>2</sup>, Lucia Groizard-Payeras<sup>2</sup>, Elizabeth  
3 Couper<sup>3</sup>, Carole J. R. Bataille<sup>2</sup>, Mark Stevenson<sup>4</sup>, Len W. Seymour<sup>4</sup>, Stephen G. Davies<sup>2</sup>, William S. James<sup>3</sup>,  
4 Sally A. Cowley<sup>3\*</sup>, Angela J. Russell<sup>1,2\*</sup>.

5  
6 <sup>1</sup>Department of Pharmacology, University of Oxford, Mansfield Rd, Oxford OX1 3QT, UK; <sup>2</sup>Department of  
7 Chemistry, Chemistry Research Laboratory, University of Oxford, 12 Mansfield Road, OX1 3TA, Oxford, UK;  
8 <sup>3</sup>James Martin Stem Cell Facility, Sir William Dunn School of Pathology, University of Oxford, South Parks  
9 Road, Oxford, OX1 3RE, UK; <sup>4</sup>Department of Oncology, Old Road Campus Research Building, University of  
10 Oxford, Roosevelt Drive Oxford, OX3 7DQ, UK

11

## 12 **Abstract**

13 The large-scale and cost-effective production of quality-controlled human pluripotent stem cells (hPSC) for  
14 use in cell therapy and drug discovery requires chemically-defined xenobiotic-free culture systems that  
15 enable easy and homogeneous expansion of pluripotent cells. Through phenotypic screening, we have  
16 identified a small molecule, OXS8360 (an optimized derivative of (-)-Indolactam V ((-)-ILV)), that  
17 stably disrupts hPSC cell-cell contacts. Proliferation of hPSC in OXS8360 is normal, as are  
18 pluripotency signatures, directed differentiation to hallmark lineages and karyotype over extended  
19 passaging. In 3D culture, OXS8360-treated hPSC form smaller, more uniform aggregates, that are  
20 easier to dissociate, greatly facilitating expansion. The mode of action of OXS8360 involves  
21 disruption of the localisation of the cell-cell adhesion molecule E-cadherin, via activation of  
22 unconventional Protein Kinase C isoforms. OXS8360 media supplementation is therefore able to  
23 yield more uniform, disaggregated 2D and 3D hPSC cultures, providing the hPSC field with an  
24 affordable tool to improve hPSC quality and scalability.

25

## 26 **Introduction.**

27 Human pluripotent stem cells (hPSC) have the unique properties of indefinite self-renewal and the ability to  
28 differentiate into representatives of the three germ layers<sup>1</sup>. However, a fundamental requirement needed to  
29 exploit the full potential of hPSC, in both research and medicine, is the ability to produce large numbers of

30 cells of consistent quality and in a cost effective manner. In addition, the application of hPSC also requires  
31 ease of use, and good manufacturing practice (GMP) compatibility, without compromising pluripotency or  
32 increasing heterogeneity in the culture<sup>2</sup>. While hPSC are most commonly grown in chemically defined media,  
33 such as mTeSR1<sup>TM</sup> <sup>3</sup> or E8<sup>4</sup>, the main challenge encountered in traditional 2D culture methods is the limited  
34 quantities in which hPSC can be produced for experimental and therapeutic application. Zweigerdt *et al.*<sup>5</sup>  
35 have shown that at least  $2 \times 10^9$  differentiated cells of the representative lineage would be necessary to treat  
36 one individual in the case of heart repair or  $\beta$ -cell replacement in type 1 diabetes, which requires about 500  
37 densely grown 10-cm dishes and complex automation. One strategy for overcoming these difficulties is to  
38 develop 3D suspension culture methods allowing more reliable, simple, cost-effective and industrial-scale  
39 production of hPSC versus 2D systems. Free-floating 3D cultures (e.g. suspension culture in bioreactors) are  
40 expected to meet the high demand for cells needed for such applications. However, this approach can invoke  
41 problems with cell aggregation. Cells in the centre of these aggregates are generally underexposed to the  
42 medium, resulting in variable growth rates, apoptosis, uncontrolled differentiation and an eventual increase  
43 in heterogeneity<sup>6</sup>. Others have also explored the use of mechanical agitation (limited by shearing force),  
44 microcarriers, micropatterning and thermoreversible hydrogels<sup>7, 8</sup>. Despite their contribution to the field,  
45 each has its own limitations and struggle either to support rapid expansion or to prevent the formation of  
46 heterogeneous cell aggregates, leading to loss of pluripotency at higher cell densities<sup>2, 8</sup>. Chemical approaches  
47 to disrupt cell-cell contact in hPSC while maintaining pluripotency are an innovative approach to address this  
48 issue. A similar strategy has been previously described for mouse embryonic stem cells (mESC)<sup>9, 10</sup>. Here, we  
49 describe the novel use of a small molecule that reduces cell-cell adhesion, allowing the formation of smaller  
50 and more homogeneous hPSC aggregates while maintaining both pluripotency and viability, thereby  
51 improving scalability.

52

## 53 **Results.**

### 54 ***(-)-ILV and OXS8360 induce iPSC spreading in 2D cultures.***

55 Disruption of cell-cell junctions is a requirement for epithelial cells to scatter<sup>9</sup>. With this in mind, a phenotypic  
56 screening assay was developed to identify small molecules causing hPSC colony disruption on the OX1-18 cell

57 line<sup>11</sup> in the first instance (Table S1). This identified the natural compound (-)-ILV (Fig. 1a), which allowed cells  
58 to separate from their neighbours in a concentration-dependent manner, with a minimal effective  
59 concentration of 1  $\mu$ M (Fig. 1b). However, as (-)-ILV exhibited a reduction in cell viability over time (Fig. S1),  
60 an analysis of structural analogues of (-)-ILV was undertaken. One analogue, OXS8360 (Fig. 1a), induced iPSC  
61 cell scattering at 1  $\mu$ M while maintaining high viability, as assessed by acridine orange. iPSC were cultured in  
62 the presence of (-)-ILV or OXS8360 and imaged after 3, 12 and 24h of treatment (Fig. 1b). Morphological  
63 changes were observable within 3h post treatment, with particularly pronounced separation of cells on  
64 colony peripheries, indicating the rapid effect of OXS8360. Colony disruption was more evident at 12h and  
65 reached a completely non-colony-based phenotype by 24h. Live imaging of OXS8360-treated iPSC also showed  
66 a dynamically spreading phenotypic effect over 5 hours versus untreated cells (Video, S.I). Additionally, three  
67 genetically distinct healthy control donor iPSC lines (SFC840-03-06, SFC85403-02, and SFC856-03-04<sup>12</sup>) (Table  
68 S1) treated with either (-)-ILV or OXS8360 showed the same phenotypic effect, demonstrating the robustness  
69 of the effect (Fig. S2). Finally, the karyotypes of all four iPSC cell lines remained stable over 10 passages of  
70 OXS8360-treatment (Fig. S3).

71 Next, the reversibility of (-)-ILV and OXS8360-induced morphological changes was assessed (experimental  
72 timeline schematically presented in Fig. 1c). 24h after plating (in medium containing Rho-kinase inhibitor  
73 Y27632 to prevent apoptosis during single cell passaging), iPSC started to form early colonies. Removal of  
74 Rho-kinase inhibitor and subsequent treatment with 1 $\mu$ M (-)-ILV or OXS8360 showed colony disruption 24h  
75 later. Finally, colony-based morphology was restored 24h after a compound-free medium change (Fig. 1c).

76 As (-)-ILV or OXS8360 treatment induced iPSC scattering, the resultant changes in cell morphology were  
77 quantified. Treatment with (-)-ILV or OXS8360 induced a significant reduction in cell density (nuclei/area)  
78 versus DMSO (3.5-fold and 2.7-fold, respectively). This was accompanied by a flattening of the phenotype,  
79 resulting in nuclei that were significantly greater in area and perimeter but significantly reduced in height  
80 (Fig. 1d). Geometric mean forward scatter (which reflects cell volume, obtained from flow cytometry  
81 datasets) showed no significant difference between OXS8360-treated and untreated iPSC (by comparison,  
82 human dermal fibroblasts (HDF) were significantly higher, Fig.1d), showing that overall cell volume was not

83 changed, just a transition to a more flattened phenotype. Staining of iPSC actin filaments with phalloidin-  
84 iFluor 488 revealed cytoskeleton remodelling upon (-)-ILV or OXS8360 treatment. Control iPSC were  
85 characterized by few but organized actin filaments at cell-cell contacts, whereas (-)-ILV or OXS8360-treated  
86 iPSC had a significant increase (5.8 and 3.5 fold, respectively) in phalloidin signal, with F-actin arranged as  
87 stress fibres, indicative of weak cell-cell junctions<sup>13, 14</sup> (Fig. 1d and 1e). These results show that both (-)-ILV  
88 and OXS8360 induce colony disruption involving substantial actin rearrangement in 2D-cultured iPSC, and  
89 that this phenotype is reversible.

90

### 91 ***iPSC proliferate normally with OXS8360.***

92 As we had noted that (-)-ILV was toxic to iPSC, we explored the mechanism of cell death, and determined the  
93 concentration that inhibits cell survival by 50% for each compound. Activity assays for caspase 3 and 7 in  
94 whole cell lysates from iPSC treated over 24 h with concentrations ranging from 0.1 to 100  $\mu$ M showed that  
95 (-)-ILV induced caspase 3 and 7 activation in a dose-dependent manner, with half maximal activity at 0.33  
96  $\mu$ M (Fig. S4). Half maximal activity for OXS8360-treated cells was at 89.1  $\mu$ M, indicating much lower caspase  
97 induction. Flow cytometry for Annexin V-FITC and Propidium Iodide of (-)-ILV-treated cells showed that over  
98 72h they shifted progressively from a population of healthy cells (Q4) to early apoptotic (Q3) and late  
99 apoptotic populations (Q2) (Fig. S5). These findings show that (-)-ILV exhibits high toxicity towards iPSC,  
100 therefore (-)-ILV was not used further, and only OXS8360 was taken forward for further studies.

101 To test whether iPSC proliferative ability would be affected following OXS8360 treatment, we examined  
102 expression of Ki-67, a protein that is present during all active phases of the cell cycle (G(1), S, G(2), and  
103 mitosis), but is absent from resting cells (G(0))<sup>15</sup>. Confocal imaging of untreated and OXS8360-treated iPSC  
104 for three passages revealed high levels of Ki-67 staining in both conditions (with HDF serving as a low-  
105 proliferating control) (Fig. 2a). Flow cytometry quantification of Ki-67-positive cells showed no significant  
106 difference between OXS8360 treated iPSC (99.4% $\pm$ 0.05; n=3), versus controls (99.0% $\pm$ 0.12; n=3), with HDF  
107 (12.3% $\pm$ 0.03, n=3) significantly lower than iPSC (Fig. 2b, 2c).

108

109 ***OXS8360-treated iPSC maintain pluripotent signatures.***

110 We next examined whether OXS8360 had any effect on the pluripotency signatures of iPSC treated over  
111 multiple passages. Firstly, untreated cells or cells treated for 3 passages were similarly Nanog<sup>+</sup>/Tra-1-  
112 60<sup>+</sup>/SSEA-3<sup>+</sup>/SSEA-4<sup>+</sup> by flow cytometry (Fig. 3a), and negative for the mesenchymal surface marker CD44<sup>16</sup>.  
113 Furthermore, immunocytochemical analysis of cells confirmed Tra-1-60 and Nanog expression (Fig. 3b). iPSC  
114 treated with OXS8360 over 10 passages continued to express Tra-1-60 and Nanog, more consistently than  
115 the untreated controls, in all four genetically distinct cell lines (Fig. S6). Therefore, the expression of  
116 pluripotency markers in iPSC cultured with 1 $\mu$ M OXS8360 is stable over at least 10 passages.

117  
118 Gene expression signatures can effectively report on the differentiation potential of hPSCs<sup>17</sup>, and ScoreCard,  
119 a qRT-PCR-based assay that evaluates pluripotency and differentiation signatures, offers a valuable  
120 quantitative approach for line-to-line comparison. Moreover, ScoreCard has been shown to be sensitive  
121 enough to compare the functional pluripotency of samples in distinct culture conditions, making it an  
122 appropriate genetic tool for our purpose<sup>18</sup>. Hence, Scorecard was used to test iPSC treated for three passages  
123 with OXS8360, to assess self-renewal signatures and undirected differentiation to the three germline lineages  
124 via embryoid bodies (EBs)<sup>19, 20</sup> (imaged in Fig. S7). Both control DMSO and OXS8360-treated iPSC displayed  
125 expected expression signatures representing pluripotency, ectodermal, mesodermal and endodermal  
126 differentiation (Fig. 3c), expressed in an algorithm score against a reference dataset (Fig.3d), with consistent  
127 positive scores for pluripotency and negative scores for the three differentiation signatures as  
128 undifferentiated cells, and upregulated gene signatures for all three germ layers upon spontaneous  
129 differentiation (Fig.3e, Ct values Table S2).

130

131 ***OXS8360-treated iPSC exhibit normal directed differentiation.***

132 We then assessed the capacity of iPSC treated with OXS8360 for three-passages to differentiate along defined  
133 pathways. iPSC differentiated to mesoderm-derived, primitive macrophages (pMac)<sup>11, 21</sup> displayed expected  
134 morphology, including voluminous cytoplasm, membrane ruffles, and a proportion with an elongated  
135 spindle-like form<sup>11</sup> (Fig.4a), together with characteristic macrophage cluster of differentiation (CD) markers

136 CD11b, CD14 and CD45 (Fig. 4b). Directed differentiation of iPSC treated for three passages with OXS8360 to  
137 a neuroectodermal lineage (cortical neuron progenitors)<sup>22</sup>, gave rise to neuronal rosettes on day 16, followed  
138 by neurons visible at day 25 (Fig. 4c), which expressed cortical neuron markers TUJ1 and PAX-6 (Fig. 4d).  
139 Together, these results show that OXS8360-treated iPSC are competent at directed differentiation to key  
140 mesodermal and neuroectodermal lineages.

141  
142 ***3D culture of iPSC with OXS8360 enables formation of smaller aggregates.***

143 To assess whether the scattering of OXS8360-treated iPSC in 2D culture would lead to improved 3D culture,  
144 iPSC were seeded in six-well low attachment plates at  $0.5 \times 10^6$  cells per well (adapted from Zweigert *et al.*<sup>5</sup>)  
145 and cultured for 10 passages in suspension, subculturing every 4 days with or without OXS8360. 4 days after  
146 the 10<sup>th</sup> passage, untreated cells remained in large aggregates, whereas OXS8360 treated iPSC formed much  
147 smaller aggregates (Fig. 5a, Fig. S8). After 10 passages, Tra 1-60 and Nanog showed bimodal expression in  
148 the untreated cells, indicating a population of non-pluripotent cells, whereas OXS8360-treated cells retained  
149 a monomodal expression (Fig. 5b). Mean aggregate area was significantly smaller for OXS8360-treated ( $p <$   
150  $0.001$ ) versus untreated cultures (Fig. 5c). A three to six-fold expansion in seeded cells was observed during  
151 each passage for both conditions (Fig. S9). OXS8360-treated aggregates were much more easily dissociated  
152 to single cells as evidenced by significantly fewer residual cell clusters ( $14.5\% \pm 1.15$ ,  $n=3$ ,  $p < 0.001$ ) versus  
153 control cultures ( $33\% \pm 1.15$ ,  $n=3$ ) (Fig. 5d). Finally, the karyotype of iPSC treated with OXS8360 for 10 passages  
154 remained stable (Fig S3). These results show that iPSC can be 3D-cultured for extended periods of time in  
155 OXS8360 containing medium, reducing aggregation, maintaining pluripotency and facilitating dissociation.

156  
157 ***OXS8360 suppresses homophilic interactions between the extracellular domains of E-cadherin in iPSC.***

158 To explore the effect of OXS8360 on iPSC architecture, specifically E-cadherin-associated adherens junctions,  
159 OXS8360-treated iPSC were fixed and stained with anti E-cadherin mAb clones 36 and SHE78-7, commercially  
160 available antibodies that recognise an intracellular portion and the first extracellular domain (EC1) of E-  
161 cadherin respectively<sup>23, 24</sup>. Fluorescence intensity remained similar between treated and control cells when  
162 stained for intracellular E-cadherin (Fig. 6a). In contrast, and consistent with the observed disruption of iPSC

163 colonies, the fluorescence intensity at cell-cell contacts revealed using the EC1 antibody recognising the  
164 extracellular domain was much weaker in OXS8360-treated cells than control cells.

165

166 Separation of adjacent epithelial cells has been shown to be induced by disruption of cell-cell E-cadherin  
167 interactions. Several examples of mechanisms resulting in loss of this protein's surface expression include  
168 internalization of E-cadherin, proteosomal degradation, and proteolytic cleavage<sup>25</sup>. Cleavage of mature E-  
169 cadherin (120 kDa), results in the shedding of a soluble 80 kDa E-cadherin fragment. Therefore, we sought to  
170 measure its presence in the supernatant of both treated and untreated iPSC. Cells were plated and grown  
171 for 24 hours prior to treatment with 0.1% DMSO (negative control), 50  $\mu$ M ethylenediaminetetraacetic acid  
172 (EDTA) (used as a positive control shown to enhance E-cadherin cleavage<sup>26</sup>) or 1  $\mu$ M OXS8360 for 24 hours.  
173 Soluble E-cadherin released from cultured cells significantly increased in the presence of OXS8360 (Fig. 6b),  
174 as measured by ELISA, consistent with the adhesion-inhibitory effects.

175

#### 176 ***PKC modulates iPSC spreading induced by OXS8360.***

177 As OXS8360 has been reported to be a protein kinase C (PKC) activator, binding to the conventional ( $\alpha$ ,  $\beta$ ,  $\gamma$ )  
178 and novel ( $\delta$ ,  $\epsilon$ ) PKC isoforms<sup>27</sup>, we hypothesised that the observed iPSC phenotype may be mediated through  
179 this pathway. A comparison with structurally unrelated PKC activators was first carried out. Treatment of  
180 iPSC with commercially available phorbol esters (known to be PKC activators<sup>28</sup>) gave a similar effect on colony  
181 disruption to OXS8360 (Fig. S10). We next determined the expression levels of PKC isoforms in iPSC, which  
182 have been reported to exhibit tissue-specific levels of expression<sup>28</sup>. All conventional, novel and atypical PKC  
183 isoforms (cPKC, nPKC, aPKC) were expressed in the iPSC line OX1-18, with PKC  $\delta$ ,  $\iota$  and  $\zeta$  the most highly  
184 expressed. With the exception of PKC $\delta$ , no significant differences in the expression of isoforms were observed  
185 upon 72h treatment with OXS8360 compared with untreated cells (Fig. 6c).

186

187 In addition, using a relative kinase assay, we observed that 1  $\mu$ M OXS8360 induced a statistically significant  
188 increase in PKC enzymatic activity in iPSC (Fig. 6d).

189

190 Finally, two pharmacological PKC inhibitors, namely Gö6976 and Gö6983, were tested for their ability to block  
191 OXS8360-induced morphological change in iPSC. These inhibitors have been shown to inhibit PKC isoforms  
192 at nanomolar concentrations<sup>29, 30</sup>. Gö6976 has been reported to be a specific inhibitor of the conventional  
193 PKC isoforms  $\alpha$  and  $\beta$  whereas Gö6983 acts as pan-PKC inhibitor with more affinity for conventional and novel  
194 isoforms than atypical isoforms<sup>29, 30</sup>. While blocking the PKC pathway with conventional PKC inhibitor Gö6976  
195 had no effect, pan-PKC inhibitor Gö6983 reversed the effect of OXS8360 on colony disruption (Fig. 6e),  
196 suggesting the effects of OXS8360 may be mediated via unconventional PKC isoforms.

197

198 Taken together this data suggests that the effect of OXS8360 may be mediated at least in part through the  
199 activation of novel PKC isoforms.

200

## 201 **Discussion.**

202 This study has identified a small molecule, OXS8360, which overcomes some of the limitations in iPSC culture  
203 by reversibly disrupting 2D colonies and 3D aggregates, thereby allowing more homogeneous cultures. Our  
204 phenotypic studies were reproducible across four genetically distinct iPS cell lines, overcoming inherent iPSC  
205 line-to-line variability and molecular heterogeneity<sup>31</sup>.

206

207 OXS8360-treated 2D-cultured cells displayed remodelling of the actin cytoskeleton and less tightly-packed  
208 colonies. However, note that we could not confirm total contact-independence. OXS8360-treated 3D-  
209 cultured cells displayed smaller, looser aggregates, resulting in a more homogeneous cell population, with  
210 improved dissociation capacity. This overcomes several limitations of current 3D aggregate systems,  
211 especially transport of nutrients and small molecules that play an important role in pluripotency  
212 maintenance<sup>6, 32</sup>.

213

214 OXS8360-treated iPSC maintained a highly proliferative self-renewal capacity<sup>33</sup> (assessed by Ki-67 staining  
215 and cumulative cell-count), and a pluripotent signature, shown by expression of widely accepted markers<sup>34</sup>,  
216 ScoreCard assay, undirected differentiation into all three germ layers, and directed differentiation to



217 mesodermal (macrophages) and neurectodermal (cerebral cortical neurons) lineages. Extended culture for  
218 10 passages demonstrated that OXS8360-treated iPSC preserved their key iPSC characteristics, including  
219 karyotypic stability. Therefore, OXS8360 is fully compatible with iPSC functionality over extended passaging.

220

221 To elucidate the mechanism of action of OXS8360, and consistent with previous reports<sup>27</sup>, we showed that  
222 OXS8360 increased PKC activity in iPSC. PKC is a pleiotropic enzyme, but also mediates the tumour-promoting  
223 activity of phorbol esters and certain teleocidin natural products, including (-)-ILV<sup>35</sup>. The tumor-promoting  
224 potential of the phorbol ester TPA is context dependent<sup>35</sup>, and structure-activity-relationship analysis of (-)-  
225 ILV has demonstrated that tumour-promoting activity is not observed across all related structures and not  
226 necessarily dependent on PKC activation<sup>36</sup>. Furthermore activation of PKC by other chemotypes (e.g.  
227 bryostatin) has been demonstrated to lack tumour-promotor activity<sup>37</sup>. PKC activators have not been  
228 reported as tumour *initiators*, and importantly in our study we see no evidence of any effect on genome  
229 integrity or proliferation rate following OXS8360-treatment.

230

231 All cPKCs, nPKCs and aPKCs isozyme transcripts were detectable in iPSC. However, it remains unclear whether  
232 OXS8360 exerts its effects through specific PKC isozymes. Moreover, specific PKC isoforms<sup>38</sup> or exposure to  
233 activators<sup>35</sup> can have opposing effects in different cell types, depending on the stimulus and PKC intracellular  
234 localisation. Therefore we compare our results here with other reports studying PKC isoform effects in  
235 epithelial cell types. The effect of OXS8360 on iPSC was not abrogated by Gö6976 (a PKC  $\alpha$  and  $\beta$  inhibitor),  
236 however, this does not rule out an effect mediated by PKC $\gamma$ . In rabbit lens epithelial cells, PKC $\gamma$  has been  
237 reported to play a role in the regulation of the gap junction protein, connexin 43<sup>39</sup>. Of the nPKCs, PKC $\epsilon$  has  
238 been shown to suppress adherens junctions through adducin<sup>40</sup>, weaken tight junctions through claudin-4<sup>41</sup>  
239 and promote epithelial-mesenchymal transition (EMT)<sup>42</sup>. PKC $\delta$  has been shown to modulate cell scattering  
240 in MDCK cells<sup>23</sup> and human keratinocytes<sup>43</sup>. Both studies suggest that PKC $\delta$  might interfere with homophilic  
241 interactions between E-cadherin ectodomains, thus suppressing adherens junctions. Meanwhile, Oh *et*  
242 *al.*<sup>44</sup> reported the involvement of PKC $\delta$  in the regulation of peripheral actin organization and cell-cell contacts  
243 in the epithelium. Interestingly, PKC $\delta$  was found to be the most highly expressed isoform in iPSC.

244

245 OXS8360-treated iPSC shed more E-cadherin into the medium, and the E-cadherin ectodomain  
246 (immunostaining with antibody SHE78-7) decreased, whereas the cytoplasmic domain of E-cadherin  
247 (antibody clone 36) was unchanged, as previously observed<sup>23</sup>. It is possible that PKC directly phosphorylates  
248 the cytoplasmic domain of E-cadherin causing a conformational change on the ectodomains, disfavoring the  
249 homophilic binding of the ectodomains of E-cadherin, identified as cleavage sites for proteases<sup>45,46</sup>.  
250 Alternatively, other proteins involved in the assembly of adherens junctions may be phosphorylated by PKC  
251 activation indirectly. PKC-mediated phosphorylation of  $\beta$ -catenin negatively regulates the Wnt/  $\beta$ -catenin  
252 pathway leading to disconnection of its interaction with cytoplasmic E-cadherin<sup>47</sup>. Overall we propose that  
253 activation of PKC leads to weakening of cell-cell junctions and shedding of soluble E-cadherin, although  
254 further studies will be necessary to clarify which PKC isoform or isoforms are involved and the intermediate  
255 mechanistic steps.

256

## 257 **Conclusion**

258 In summary, we have identified a small molecule additive, OXS8360, which enables more uniform 2D and 3D  
259 culture of iPSC without compromising potency or genetic integrity. In 3D culture systems, our approach  
260 reduces the number of culture components needed, as no hydrogel or microcarrier-based culture is required  
261 to control aggregate size. The looser and smaller aggregates facilitate maintenance and expansion of iPSC  
262 while also overcoming issues of diffusion and homogeneity. This approach will improve the efficiency and  
263 reproducibility of hPSC culture at scale.

264

## 265 **Statistical analysis**

266 GraphPad Prism was used for statistical analysis. One-way ANOVA with Sidak's or Dunnett's multiple  
267 comparisons or paired two-tailed t test were used as indicated. Values are indicated in figures as \*p < 0.05,  
268 \*\*p < 0.01, \*\*\*p < 0.001, \*\*\*\*p < 0.0001, and n.s. (not significant).

269

270

## 271 **Methods**

### 272 ***Cell lines and culture***

273 This study was carried out using four reprogrammed iPSC lines (Table S1), with human dermal fibroblasts  
274 (HDF) as a control where necessary. The iPSC and HDF were all derived in Oxford from healthy control donors  
275 recruited through the Oxford Parkinson's Disease Centre - participants were recruited having given signed  
276 informed consent, which included derivation of hiPSC lines from skin biopsies (Ethics Committee, National  
277 Health Service Health Research Authority, NRES Committee South Central, Berkshire, UK, REC 10/H0505/71).  
278 All experiments were performed in accordance with UK guidelines and regulations and as set out in the REC  
279 and the iPSC lines used have all been published previously (Table S1).

280 iPSCs were maintained in 2D feeder-free conditions on hESC-qualified Matrigel (Corning), or Geltrex (Life  
281 Technologies) in complete mTeSR<sup>TM</sup>1 (Stem Cell Technologies) supplemented with 100 units/mL of penicillin-  
282 streptomycin (Gibco<sup>TM</sup>) at 37°C in a humidified atmosphere with 5% CO<sub>2</sub>. At approximately 80% confluence,  
283 cells were dissociated for 5 min at 37°C in prewarmed TrypLE Express (Gibco<sup>TM</sup>). TrypLE Express was then  
284 diluted 1:10 in prewarmed 1x Dulbecco's phosphate-buffered saline (DPBS), and cells centrifuged for 5 min  
285 at 400 rcf. Supernatant was removed and cell pellets were gently resuspended to give a single cell suspension  
286 in medium supplemented with 10 µM ROCK inhibitor Y-27632 (Sigma-Aldrich). Daily medium change was  
287 performed by replacing the medium with fresh mTeSR<sup>TM</sup> without ROCK inhibitor Y-27632.

288 For static suspension culture<sup>i</sup>, 6-well plates with repellent surfaces were used (Greiner Bio-One<sup>TM</sup>). 3 mL of a  
289 cell suspension at a density of 0.33x10<sup>6</sup> cells/mL were supplemented with 100 units/mL penicillin-  
290 streptomycin and 10 µM ROCK inhibitor Y-27632. Aggregates were allowed to form at 37°C in a humidified  
291 atmosphere with 5% CO<sub>2</sub> over 4 days with no medium change. On day 4 of suspension culture, aggregates  
292 were transferred to 15-mL tubes. Supernatant was removed after centrifugation at 400 rcf for 5 min. This  
293 was followed by incubation in 1 mL of TrypLE for 5 min in a water bath set at 37°C. Cells were centrifuged at  
294 300 rcf for 4 min to remove the supernatant and resuspended in 1 mL of mTeSR<sup>TM</sup> prior to filtration through  
295 a 30 µm sieve. The membrane was washed with 1 mL mTeSR<sup>TM</sup> and cells were resuspended in the appropriate

296 volume of ROCK inhibitor Y-27632 supplemented mTeSR1™. A dedicated incubator was used to prevent  
297 inadvertent agitation of the cultures through door opening/closing.

298 When treated with compounds for experiments, cells were cultured in the presence of 0.1% DMSO, 1 μM (-  
299 )-ILV, or 1 μM OXS8360 unless stated otherwise. Cell phenotype was monitored by using phase contrast  
300 microscopy with an EVOS XL cell imaging system.

301 HDFs were cultured in T-25 flasks (Corning) at 37°C and 5% CO<sub>2</sub> with 6 mL HDF medium consisting of 1x  
302 Advanced DMEM (Gibco™), 1x Glutamax™ (Gibco™), 100 μM β-mercaptoethanol (Gibco™), 0.1x fetal  
303 bovine serum (Sigma). Medium was changed every 4 days and cell passaging was as described for iPSCs.

304

#### 305 ***Caspase activity assay***

306 Measurements of caspase activities in cells were performed using the commercially available Caspase-Glo  
307 3/7 Assay (Promega, Madison, WI) according to the manufacturer's instructions. A previous experiment for  
308 the determination of the cell density revealed an optimal linear range of the assay at 10.000 cells/well in a  
309 96 well format.

310

#### 311 ***Annexin V assay***

312 iPSCs were seeded at a density of 1x10<sup>5</sup> cells/well onto a 24-well plate, and treated for 24h, 48h and 72h  
313 with 1 μM of (-)-ILV or 0.1% DMSO and apoptotic cells were analyzed by using Annexin V FITC apoptosis  
314 detection kit (Abcam). Following treatment, cells were washed with 500 μL Hank's Balanced Salt Solution  
315 (HBSS, Gibco™) and dissociated as described above. Centrifugation was 400 rcf for 5 min and pellets  
316 resuspended in a 100 μL 1x binding buffer. Further incubation was performed with 5 μL of FITC-conjugated  
317 Annexin V and 5 μL of propidium iodide for 15 min in the dark. Prior to analysis, 200 μL of binding buffer was  
318 added to each sample. Quantification was realized by flow cytometry and data analyzed using FlowJo  
319 software.

320

#### 321 ***Flow cytometry***

322 For assessing cell surface antigens, 30 min staining on ice was carried out on fresh cells in cold FACS buffer  
323 consisting of PBS, 10 µg/mL human IgG (Sigma), 1% FBS (Hyclone) and 0.01% sodium azide prior to fixation.  
324 For intracellular antigens, staining was carried out on cells fixed with 4% paraformaldehyde (PFA) in PBS for  
325 10 min and stored in methanol at -20°C for up to 4 weeks. Cells were stained at a density of 1x10<sup>6</sup> cells/mL  
326 in a total of 100 µL FACS buffer with the appropriate antibody or isotype-matched control in a V-bottom 96-  
327 well plate. For two-colour staining, two antibodies or two isotype controls (attached to different  
328 fluorophores) were added together. Following an incubation of 90 min at room temperature, cells were  
329 washed three times with FACS buffer. When using unconjugated antibodies, a further incubation of 40 min,  
330 at room temperature, was performed with a secondary antibody. Samples were washed another 3 times and  
331 analysed using FACS Calibur flow cytometer (Becton Dickinson). Data were analysed using FlowJo software  
332 and antibodies used are described in the table below.  
333

| <b>Product</b> | <b>Host</b> | <b>Isotype, conjugate<br/>fluorophore</b> | <b>Supplier</b>   | <b>[c]</b> | <b>Catalogue<br/>number</b> |
|----------------|-------------|-------------------------------------------|-------------------|------------|-----------------------------|
| Anti-CD44      | Mouse       | IgG <sub>1</sub> , FITC                   | Life Technologies | 1:40       | 11044182                    |
| Anti-SSEA3     | Rat         | IgGM, Alexa Fluor 488                     | Biolegend         | 1:80       | 330306                      |
| Anti-SSEA4     | Mouse       | IgG <sub>3</sub> , APC                    | R&D               | 1:20       | FAB1435A                    |
| Anti-Tra1-60   | Mouse       | IgM, PE                                   | Biolegend         | 1:10       | 330609                      |
| Anti-Tra1-60   | Mouse       | IgM, Alexa Fluor 488                      | Biolegend         | 1:10       | 330613                      |
| Anti-Nanog     | Rabbit      | IgG, Alexa Fluor 647                      | Cell Signaling    | 1:10       | 5448S                       |
| Anti-KI-67     | Mouse       | IgG <sub>1</sub>                          | Merck             | 1:400      | MAB4190                     |
| Anti-CD11b     | Mouse       | IgG <sub>1</sub> , APC                    | Biolegend         | 1:25       | 301309                      |
| Anti-CD14      | Mouse       | IgG <sub>1</sub> , PE                     | ImmunoTools       | 1:25       | 21620144                    |
| Anti-CD45      | Mouse       | IgG <sub>1</sub> , APC                    | ImmunoTools       | 1:25       | 21270456                    |

|                    |        |                                                 |                |        |         |
|--------------------|--------|-------------------------------------------------|----------------|--------|---------|
| Isotype control    | Mouse  | IgG <sub>1</sub> , FITC                         | Biologend      | 1:50   | 400107  |
| Isotype control    | Rat    | IgM, Alexa Fluor 488                            | Biologend      | 1:100  | 400811  |
| Isotype control    | Mouse  | IgG <sub>3</sub> , APC                          | R&D            | 1:20   | IC007A  |
| Isotype control    | Mouse  | IgM, Alexa Fluor 488                            | Biologend      | 1:10   | 401617  |
| Isotype control    | Rabbit | IgG, Alexa Fluor 647                            | Cell Signaling | 1:10   | 2985S   |
| Secondary antibody | Donkey | IgG, anti-mouse Alexa Fluor 647                 | Invitrogen     | 1:1000 | A-31571 |
| Secondary antibody | Goat   | IgM, anti-mouse, Alexa Fluor 488                | Invitrogen     | 1:1000 | A-21042 |
| Secondary antibody | Goat   | IgG <sub>2a</sub> , anti-mouse, Alexa Fluor 647 | Invitrogen     | 1:1000 | A-21241 |
| Secondary antibody | Goat   | IgG, anti-rabbit, Alexa Fluor 647               | Invitrogen     | 1:1000 | A-21244 |

---

334

335 ***Undirected differentiation***

336 iPSC were washed with PBS and harvested by incubating the cells for 5 min at 37°C with 1 mL warm TrypLE  
337 Express (Gibco™). The cells and TrypLE were well mixed into a single cell suspension by pipetting up and  
338 down and collected in a 15 mL centrifuge tube and diluted 1:10 with PBS. Cells were counted and spun down.  
339 After centrifugation PBS was aspirated and the cell pellet was tapped loose and resuspended in mTeSR™-1  
340 spin-EB medium consisting of mTeSR™-1 (Stem Cell Technologies), supplemented with 1 mM Rock-inhibitor  
341 (Y27632, Calbiochem). For AggreWells™800 (Stemcell Technologies, 300 micro-wells), plates were first  
342 prepared After preparing the plate, 1 mL of 4×10<sup>6</sup> PSC were added per well. The plate containing PSC and 2  
343 mL of spin-EB medium per well was centrifuged at 800 rpm for 3 minutes. The plate was examined under the  
344 microscope to verify cells were evenly distributed among the micro-wells. Very gently the plate was put into  
345 the incubator and left for four days. The EBs were fed daily with spin-EB medium (first brought to RT), by

346 gently aspirating 1 mL medium using a p1000 Gilson and very gently adding 1 mL fresh spin-EB medium in a  
347 drop-wise manner down the side of the well so the EBs were not washed out of the microwells. This wash  
348 was repeated to achieve a 75% medium change overall. To harvest EBs at day 4, the contents of the wells  
349 were pipetted up and down several times using a 5 mL serological pipette to dislodge the EBs from the micro-  
350 wells. The contents were taken up and transferred onto a 40  $\mu$ M cell strainer inverted over a 50 mL centrifuge  
351 tube. The inverted strainer, with the EBs balanced on top, was carefully inverted over onto a new 50 mL  
352 centrifuge tube so that the EBs were now at the bottom of the strainer and could be collected into the new  
353 50 mL tube, by passing through 4 mL of relevant differentiation medium. The strainer was held at an angle  
354 to facilitate the collection of EBs. The EBs for each condition were then plated split into half and plated onto  
355 a Geltrex pre-coated 60mm petri dish (Corning) for the TaqMan hPSC Scorecard™ Panel assay.

356

#### 357 ***TaqMan hPSC Scorecard™ Panel assay***

358 To form EBs, the manufacturer's protocol described in the user guide for the TaqMan hPSC Scorecard™ Panel  
359 (Applied Biosystems™) was adapted. EBs were generated according to the EB-spin formation protocol and  
360 harvested on day 4 as outlined above. Between day 4 and 14, a 75% medium change was performed only  
361 every other day. On day 14, each cell culture dish was harvested. The culture medium was removed and cells  
362 were gently washed in 5mL PBS for 2 minutes. 700  $\mu$ l RLT buffer (Qiagen) was pipetted onto each plate  
363 supplemented with 1% of  $\beta$ -mercaptoethanol (Sigma) to reduce RNase activity. Upon cell lysis, a cell scraper  
364 (Sarstedt) was used to collect the remaining cell content. After careful homogenisation by using a Gilson  
365 p1000, the total of 700 $\mu$ l slurry was transferred in aliquots of 350  $\mu$ l onto two QIAGEN shredder membranes  
366 (Qiagen), and stored at -80°C.

367

#### 368 ***Directed differentiation to macrophages***

369 iPSCs were differentiated to macrophages as previously described by van Wilgenburg *et al.*<sup>ii</sup>. Briefly,  $3 \times 10^6$   
370 iPSCs were seeded into an Aggrewell 800 well (STEMCELL Technologies) to form EBs, in mTeSR1 and fed daily  
371 with medium plus 50 ng/mL BMP4 (Peprotech), 50 ng/mL VEGF (Peprotech), and 20 ng/mL SCF (Miltenyi  
372 Biotec). Four-day EBs were then differentiated in T175 flasks (150 EBs) in X-VIVO15 (Lonza), supplemented

373 with 100 ng/mL M-CSF (Invitrogen), 25 ng/mL IL-3 (R&D), 2 mM Glutamax (Invitrogen), 100 U/mL penicillin  
374 and 100 µg/mL streptomycin (Invitrogen), and 0.055 mM β-mercaptoethanol (Invitrogen), with fresh medium  
375 added weekly. Macrophage precursors (pMacpre) emerging into the supernatant after approximately  
376 1 month were collected weekly and differentiation cultures replenished with fresh medium. Harvested cells  
377 were strained (40 µm, Corning) and plated onto tissue-culture treated plastic at 100,000 per cm<sup>2</sup> and  
378 differentiated for 8 days to adherent macrophages (pMac) in X-VIVO15 with 100 ng/mL M-CSF, 2 mM  
379 Glutamax, 100 units/mL penicillin-streptomycin.

380

### 381 ***Directed differentiation to cortical neuron progenitors***

382 iPSCs were differentiated to cortical neuron progenitors (NPCs)<sup>iii</sup> with the following modifications: feeder-  
383 free iPSCs were plated onto Matrigel-coated 6-well plates, with neural induction for 12 days using dual SMAD  
384 inhibition; after replating the neuroepithelial sheet on precoated wells with 20 µg/mL of laminin at day 12  
385 using dispase II, 20 ng/mL fibroblast growth factor 2 (FGF2, R&D) was added to neural maintenance medium  
386 (NMM) from days 12 to 15. Thereafter, a full medium change was performed every other day. On day 18,  
387 newly formed rosettes were passaged either with dispase II or manually. For the latter, rectangles containing  
388 rosettes were cut with a needle, and in case of large size, scored into multiple rectangles. The cell sheets  
389 were then lifted manually, collected with a Gilson p200 and transferred in 2mL of NMM onto a new well  
390 precoated with 20µg/mL laminin. Between day 18 and 25, a full medium change was performed every other  
391 day, and cells were stained on day 25 for confocal imaging.

392

### 393 ***Immunocytochemistry***

394 Undifferentiated iPSCs on Geltrex coated µ-slides were prepared for immunofluorescence microscopy as  
395 followed. E-cadherin expression was monitored for cells seeded overnight prior to 24h treatment with 0.1%  
396 DMSO, 1 µM ILV or 1 µM OXS8360. When looking at the expression of KI-67, Tra 1-60 or Nanog cells were  
397 treated for 3 passages. Treated iPSCs were fixed with 4% PFA for 10 minutes at room temperature,  
398 permeabilised and blocked with 10% goat serum and 0.3% Triton X-100 in PBS overnight at 4°C prior to  
399 washing 3 times with PBS and 0.3% Triton X-100. Anti-E-cadherin (2.5 µg/mL, clone 36, BD Transduction



400 Laboratories or SHE78-7, Invitrogen), anti-KI-67 (1:400, Merck), anti-Tra-1-60 PE (conjugated, 1:10,  
401 Biologend), anti-Nanog Alexa Fluor 647 (conjugated, 1:10, Biologend) antibodies were diluted in antibody  
402 solution (PBS, 1% bovine serum albumin (BSA), 0.1% Triton X-100) and incubated overnight at 4°C. When  
403 using unconjugated antibodies, wells were washed prior to applying Alexa Fluor 647 (goat-anti-rabbit, IgG,  
404 1:1000) diluted in antibody solution (PBS, 1% BSA, 0.3% Triton-X) for 2 hours at room temperature.

405 For cortical neuronal progenitors, pretreated cells with 0.1% DMSO or 1 µM OXS8360 were passaged on day  
406 18 onto precoated µ-slides and grown until day 25. Cells were fixed with 4% PFA for 10 minutes at room  
407 temperature, permeabilised and blocked with PBS, 1% donkey serum/1% goat serum, 0.3% Triton-X  
408 overnight at 4°C. Anti-PAX-6 (1:300, Covance) and anti-TUJ-1 (1:200, Covance) were used as primary  
409 antibodies, and Alexa 488 (goat-anti-mouse, IgM, 1:1000) or Alexa Fluor 647 (goat-anti-rabbit, IgG, 1:1000)  
410 were stained for visualization.

411 After washes, nuclei were counterstained with Hoechst 33342 or DAPI for 30 minutes at room temperature.  
412 Fluorescent images were acquired using the FV1200 (Olympus) confocal microscope. All antibodies used are  
413 described in the table below.

414

| Product                        | Host   | Isotype, conjugate fluorophore | Supplier                     | [c]       | Catalogue number |
|--------------------------------|--------|--------------------------------|------------------------------|-----------|------------------|
| Anti-E-cadherin, clone 36      | Mouse  |                                | BD Transduction Laboratories | 2.5 µg/mL | 610182           |
| Anti-E-cadherin, clone SHE78-7 | Mouse  |                                | Invitrogen                   | 2.5 µg/mL | 13-5700          |
| Anti-Tra1-60                   | Mouse  | IgM, PE                        | Biologend                    | 1:10      | 330609           |
| Anti-Nanog                     | Rabbit | IgG, Alexa Fluor 647           | Cell Signalling              | 1:10      | 5448S            |
| Anti-KI-67                     | Mouse  | IgG <sub>1</sub>               | Merck                        | 1:400     | MAB4190          |
| Anti-PAX-6                     | Rabbit | IgG (polyclonal)               | Covance                      | 1:300     | PRB-278P         |

|                    |        |                                   |            |        |          |
|--------------------|--------|-----------------------------------|------------|--------|----------|
| Anti-TUJ1          | Mouse  | IgG <sub>2a</sub>                 | Covance    | 1:200  | MMS-435P |
| Secondary antibody | Donkey | IgG, anti-mouse Alexa Fluor 647   | Invitrogen | 1:1000 | A-31571  |
| Secondary antibody | Goat   | IgM, anti-mouse, Alexa Fluor 488  | Invitrogen | 1:1000 | A-21042  |
| Secondary antibody | Goat   | IgG, anti-rabbit, Alexa Fluor 647 | Invitrogen | 1:1000 | A-21244  |

---

415

#### 416 ***Enzyme-linked Immunosorbent Assay for soluble E-Cadherin***

417 Cells were seeded in a 6-well plate at a density of  $1 \times 10^6$  cells per well for 24 h prior to starting any treatment.  
418 Medium was removed and a further incubation was realized in presence of 0.1% DMSO, 1  $\mu$ M OXS8360 or  
419 50  $\mu$ M EDTA in fresh mTeSR<sup>TM</sup>. Medium from each condition was removed and E-cadherin concentrations  
420 were quantified by using Human E-Cadherin Quantikine ELISA kit (Invitrogen). The Human E-Cadherin EIA kit  
421 protocol was followed as described. Briefly, 100  $\mu$ L of all sample or standard were added to appropriate wells  
422 prior to incubating the microtiter plate for 2 h at 37°C. The sample solutions were removed and each well  
423 was washed with 3 x 350  $\mu$ L 1x Wash Buffer. Between each wash, the plate was emptied out and tapped  
424 vigorously onto paper towel, especially after the last washing. 100  $\mu$ L of Antibody-HRP Conjugate Solution  
425 was added into each well followed by a 1 h incubation at 37°C. Sample solutions were removed and wells  
426 were washed 4 times as described above. 100  $\mu$ L of Substrate Solution were added into each wells followed  
427 by a further incubation at 30°C for 30 min. 100  $\mu$ L of Stop Solution was then added to each well before  
428 recording the absorbance at OD = 450 nm.

429

#### 430 ***Quantitative real-time PCR (qRT-PCR)***

##### 431 *RNA extraction*

432 RNA was either extracted from cell pellets that had previously been stored at -80°C, or from cell slurry. For  
433 lysis, 350 $\mu$ L RLT buffer supplemented with 1% pure  $\beta$ -mercaptoethanol were added and the cell slurry was

434 transferred onto a QIAshredder spin column (Qiagen). Subsequently, cell lysates were spun on the  
 435 QIAshredder column and RNA extracted using the RNeasy kit (Qiagen) according to the manufacturer's  
 436 protocol. An optional on-column DNase treatment for 15 minutes was performed. RNA yields were measured  
 437 by loading 1.5 µL of extracted RNA onto the NanoDrop™ 2000c spectrophotometer. The optical density of  
 438 each sample was subsequently verified for its purity (A 260/280 ratio = 2).

439 *cDNA production by reverse transcription (RT)*

440 cDNA was produced by using either the Ambion RETROScript™ Kit (Invitrogen) or the High Capacity cDNA  
 441 Reverse Transcription Kit (Applied Biosystems), and in both cases a total of 1 µg RNA/sample was loaded for  
 442 the cDNA reaction. For the TaqMan hPSC Scorecard™ Panel, cDNA was produced using the High Capacity  
 443 cDNA Reverse Transcription Kit according to the manufacturer's protocol.

444 *Quantitative real-time PCR (qRT-PCR)*

445 qRT-PCR was either performed using a SYBR Green- (Applied Biosystems) or a TaqMan-based approach. To  
 446 this end, the previously generated cDNA was diluted and prepared according to tables below. The primers  
 447 for PKC isoforms and E-cadherin were adopted from Awadelkarim *et al.*<sup>iv</sup> and Labernadie *et al.*<sup>v</sup> and ordered  
 448 from Sigma. Prior to all experiments, the efficiencies of the endogenous control (TBP) and the primer pairs  
 449 were tested (Fig. S11).

450

451 *Table 1: SYBR Green sample preparation*

|                                       | <b>Primer mix<br/>(5 µL each)</b>                                           | <b>2 x SYBR<br/>Select MM</b> | <b>Nuclease-free<br/>H<sub>2</sub>O</b> | <b>Total volume</b> |
|---------------------------------------|-----------------------------------------------------------------------------|-------------------------------|-----------------------------------------|---------------------|
| <b><i>SYBR Green<br/>reaction</i></b> |                                                                             |                               |                                         |                     |
| Volume/sample<br>+                    | 0.5 µL                                                                      | 12.5 µL                       | 10 µL                                   | 23 µL               |
|                                       | 1.8 µL template cDNA (20 µL cDNA reaction diluted 1:10 in H <sub>2</sub> O) |                               |                                         | 25 µL               |

452

453 *Table 2: TaqMan sample preparation*

|  | <b>TaqMan<br/>primer</b> | <b>TaqMan Gene<br/>Expression MM</b> | <b>Nuclease-free<br/>H<sub>2</sub>O</b> | <b>Total volume</b> |
|--|--------------------------|--------------------------------------|-----------------------------------------|---------------------|
|--|--------------------------|--------------------------------------|-----------------------------------------|---------------------|

---

**TaqMan  
reaction**

|               |                                                                                       |            |             |              |
|---------------|---------------------------------------------------------------------------------------|------------|-------------|--------------|
| Volume/sample | 1 $\mu$ L                                                                             | 10 $\mu$ L | 7.2 $\mu$ L | 18.2 $\mu$ L |
| +             |                                                                                       |            |             |              |
|               | 1.8 $\mu$ L template cDNA (20 $\mu$ L cDNA reaction diluted 1:10 in H <sub>2</sub> O) |            |             | 25 $\mu$ L   |

---

454

455 The total volume of master mix and cDNA was loaded onto a MicroAmp™ Optical 96-Well Reaction Plate  
456 (Applied Biosystems), and the qRT-PCR reaction run on the StepOnePlus™ Real-Time PCR System (Applied  
457 Biosystems). Analysis of relative gene expression levels was performed according to the  $\Delta\Delta$ CT approach<sup>vi</sup>.

458 **Enzyme-linked Immunosorbent Assay for PKC activity**

459 PKC activity was tested using PKC kinase activity assay (Abcam) according to the manufacturer's protocol.  
460 Briefly, cells treated for 1 passage (5 days) with 0.1% of DMSO or 1  $\mu$ M of OXS8360 were incubated with lysis  
461 buffer (20 mM MOPS, 50 mM  $\beta$ -glycerolphosphate, 50 mM sodium fluoride, 1 mM sodium orthovanadate, 5  
462 mM EGTA, 2 mM EDTA, 1% NP40, 1 mM DTT, 1 mM benzamidine, 1 mM PMSF, 10  $\mu$ g/ml leupeptin and  
463 aprotinin) for 10 min on ice and then centrifuged at 13000 rpm for 15 min. 0.3  $\mu$ g of protein from cell lysates  
464 diluted in 30  $\mu$ L of Kinase Assay Dilution Buffer were added to the pre-soaked wells of the PKC substrate  
465 microtiter plate. Standard diluted in 30  $\mu$ L of Kinase Assay Dilution Buffer and 30  $\mu$ L of Kinase Assay Dilution  
466 Buffer (blank) were also added in appropriate wells. The kinase reaction was initiated by adding 10  $\mu$ L of ATP  
467 to each well and the samples were incubated for 90 min at 30°C with gentle shaking after 20 min. The reaction  
468 was stopped by removing the contents of each well. Samples, excluding blank ones, were incubated with 40  
469  $\mu$ L of Phosphospecific substrate antibody for 1 h at room temperature with gentle shaking every 20 min. Wells  
470 were washed four times with Wash Buffer and then incubated with 40  $\mu$ L of diluted anti-rabbit IgG-HRP  
471 antibody for 30 min at room temperature, with gentle shaking every 10 min. Subsequently, all wells were  
472 washed four times with Wash Buffer. In order to detect PKC activity, 60  $\mu$ L of TMB substrate was added to  
473 each well and the plate was incubated at room temperature for 60 min and then stopped by addition of 20  
474  $\mu$ L of Stop Solution. The PKC activity was analyzed by measuring the absorbance at OD = 450 nm.

475

476 **Methods references**

- 477 <sup>i</sup> Zweigerdt, R., Olmer, R., Singh, H., Haverich, A. & Martin, U. Scalable expansion of human pluripotent  
478 stem cells in suspension culture. *Nat Protoc* **6**, 689-700 (2011)
- 479 <sup>ii</sup> van Wilgenburg, B., Browne, C., Vowles, J. & Cowley, S.A. Efficient, long term production of monocyte  
480 derived macrophages from human pluripotent stem cells under partly-defined and fully-defined conditions.  
481 *PLoS One* **8**, e71098 (2013).
- 482 <sup>iii</sup> Shi, Y., Kirwan, P. & Livesey, F.J. Directed differentiation of human pluripotent stem cells to cerebral  
483 cortex neurons and neural networks. *Nat Protoc* **7**, 1836-1846 (2012).
- 484 <sup>iv</sup> Awadelkarim, K.D. et al. Quantification of PKC family genes in sporadic breast cancer by qRT-PCR:  
485 evidence that PKC $\lambda$  overexpression is an independent prognostic factor. *Int J Cancer* **131**, 2852-2862  
486 (2012).
- 487 <sup>v</sup> Labernadie, A. et al. A mechanically active heterotypic E-cadherin/N-cadherin adhesion enables fibroblasts  
488 to drive cancer cell invasion. *Nat Cell Biol* **19**, 224-237 (2017).
- 489 <sup>vi</sup> Livak, K.J. & Schmittgen, T.D. Analysis of relative gene expression data using real-time quantitative PCR  
490 and the 2<sup>(-Delta Delta C(T))</sup> Method. *Methods* **25**, 402-408 (2001).

491

## 492 **Acknowledgments**

493 Financial support: The Wellcome Trust WT121302 and the Oxford Martin School LC0910-004 (James  
494 Martin Stem Cell Facility, Oxford, S.A.C.). The research leading to these results has received support from the  
495 Innovative Medicines Initiative Joint Undertaking under grant agreement n° 115439, resources of which are  
496 composed of financial contribution from the European Union's Seventh Framework Programme (FP7/2007–  
497 2013) and EFPIA companies' in kind contribution. This publication reflects only the author's views and neither  
498 the IMI JU nor EFPIA nor the European Commission are liable for any use that may be made of the information  
499 contained therein. This work was also supported by funding from Oxstem Limited. We thank the High-  
500 Throughput Genomics Group at the Wellcome Trust Centre for Human Genetics, Oxford (Funded by  
501 Wellcome Trust grant reference 090532/Z/09/Z and MRC Hub grant G0900747 91070) for the generation of  
502 Illumina SNP data.

503

## 504 **Author contributions**

505 Conceptualization, S.A.C., A.J.R., W.S.J., L.S., G.L. and S.G.D.; Formal analysis, L.S., M.Sc, G.L., M.O., L.G.-P.,  
506 E.C., C.J.R.B. and M.St.; Funding acquisition, S.A.C., A.J.R., W.S.J. and S.G.D.; Investigation, L.S., M.Sc., G.L.,  
507 M.O., E.C., C.J.R.B. and M.St.; Methodology, L.S., M.Sc., G.L., M.O., L.G.-P., E.C., C.J.R.B. and M.St.; Resources,  
508 S.A.C., A.J.R., W.S.J. and L.W.S.; Supervision, S.A.C., W.S.J. and A.J.R.; Writing – original draft, L.S.; Writing –  
509 review and editing, S.A.C. and A.J.R.

510

511 **Competing interests statement**

512 The authors declare that they have no competing interests.

513 S.G.D. and A.J.R. are co-founders and minor equity holders in Oxstem Ltd.

514

515 **References**

- 516 1. Kimbrel, E.A. & Lanza, R. Current status of pluripotent stem cells: moving the first therapies to the  
517 clinic. *Nat Rev Drug Discov* **14**, 681-692 (2015).
- 518 2. Chen, K.G., Mallon, B.S., McKay, R.D. & Robey, P.G. Human pluripotent stem cell culture:  
519 considerations for maintenance, expansion, and therapeutics. *Cell Stem Cell* **14**, 13-26 (2014).
- 520 3. Ludwig, T.E. et al. Feeder-independent culture of human embryonic stem cells. *Nat Methods* **3**, 637-  
521 646 (2006).
- 522 4. Chen, G. et al. Chemically defined conditions for human iPSC derivation and culture. *Nat Methods*  
523 **8**, 424-429 (2011).
- 524 5. Zweigerdt, R., Olmer, R., Singh, H., Haverich, A. & Martin, U. Scalable expansion of human  
525 pluripotent stem cells in suspension culture. *Nat Protoc* **6**, 689-700 (2011).
- 526 6. Edmondson, R., Broglie, J.J., Adcock, A.F. & Yang, L. Three-dimensional culture systems and  
527 their applications in drug discovery and cell-based biosensors. *Assay Drug Dev Technol* **12**, 207-218  
528 (2014).
- 529 7. Ekerdt, B.L. et al. Thermoreversible Hyaluronic Acid-PNIPAAm Hydrogel Systems for 3D Stem Cell  
530 Culture. *Adv Healthc Mater* **7**, e1800225 (2018).
- 531 8. Kempf, H., Andree, B. & Zweigerdt, R. Large-scale production of human pluripotent stem cell  
532 derived cardiomyocytes. *Adv Drug Deliv Rev* **96**, 18-30 (2016).
- 533 9. Soncin, F. et al. Abrogation of E-cadherin-mediated cell-cell contact in mouse embryonic stem cells  
534 results in reversible LIF-independent self-renewal. *Stem Cells* **27**, 2069-2080 (2009).
- 535 10. Segal, J.M. & Ward, C.M. Novel peptides for deciphering structural and signalling functions of E-  
536 cadherin in mouse embryonic stem cells. *Sci Rep* **7**, 41827 (2017).
- 537 11. van Wilgenburg, B., Browne, C., Vowles, J. & Cowley, S.A. Efficient, long term production of  
538 monocyte-derived macrophages from human pluripotent stem cells under partly-defined and fully-  
539 defined conditions. *PLoS One* **8**, e71098 (2013).
- 540 12. Haenseler, W. et al. Excess  $\alpha$ -synuclein compromises phagocytosis in iPSC-derived macrophages.  
541 *Scientific reports* **7** (2017).
- 542 13. Davidson, A.J. & Wood, W. Unravelling the Actin Cytoskeleton: A New Competitive Edge? *Trends*  
543 *Cell Biol* **26**, 569-576 (2016).
- 544 14. Närvä, E. et al. A Strong Contractile Actin Fence and Large Adhesions Direct Human Pluripotent  
545 Colony Morphology and Adhesion. *Stem Cell Reports* **9**, 67-76 (2017).
- 546 15. Scholzen, T. & Gerdes, J. The Ki-67 protein: from the known and the unknown. *J Cell Physiol* **182**,  
547 311-322 (2000).
- 548 16. Quintanilla, R.H., Asprer, J.S., Vaz, C., Tanavde, V. & Lakshmipathy, U. CD44 is a negative cell surface  
549 marker for pluripotent stem cell identification during human fibroblast reprogramming. *PLoS One* **9**,  
550 e85419 (2014).
- 551 17. Bock, C. et al. Reference Maps of human ES and iPSC cell variation enable high-throughput  
552 characterization of pluripotent cell lines. *Cell* **144**, 439-452 (2011).
- 553 18. Tsankov, A.M. et al. A qPCR ScoreCard quantifies the differentiation potential of human pluripotent  
554 stem cells. *Nat Biotechnol* **33**, 1182-1192 (2015).

- 555 19. Doetschman, T.C., Eistetter, H., Katz, M., Schmidt, W. & Kemler, R. The in vitro development of  
556 blastocyst-derived embryonic stem cell lines: formation of visceral yolk sac, blood islands and  
557 myocardium. *J Embryol Exp Morphol* **87**, 27-45 (1985).
- 558 20. Pettinato, G., Wen, X. & Zhang, N. Formation of well-defined embryoid bodies from dissociated  
559 human induced pluripotent stem cells using microfabricated cell-repellent microwell arrays. *Sci Rep*  
560 **4**, 7402 (2014).
- 561 21. Buchrieser, J., James, W. & Moore, M.D. Human Induced Pluripotent Stem Cell-Derived  
562 Macrophages Share Ontogeny with MYB-Independent Tissue-Resident Macrophages. *Stem Cell*  
563 *Reports* **8**, 334-345 (2017).
- 564 22. Shi, Y., Kirwan, P. & Livesey, F.J. Directed differentiation of human pluripotent stem cells to cerebral  
565 cortex neurons and neural networks. *Nat Protoc* **7**, 1836-1846 (2012).
- 566 23. Chen, C.L. & Chen, H.C. Functional suppression of E-cadherin by protein kinase Cdelta. *J Cell Sci* **122**,  
567 513-523 (2009).
- 568 24. Brouxhon, S.M. et al. Monoclonal antibody against the ectodomain of E-cadherin (DECMA-1)  
569 suppresses breast carcinogenesis: involvement of the HER/PI3K/Akt/mTOR and IAP pathways. *Clin*  
570 *Cancer Res* **19**, 3234-3246 (2013).
- 571 25. Noë, V. et al. Release of an invasion promoter E-cadherin fragment by matrilysin and stromelysin-1.  
572 *J Cell Sci* **114**, 111-118 (2001).
- 573 26. Katayama, M. et al. Soluble E-cadherin fragments increased in circulation of cancer patients. *Br J*  
574 *Cancer* **69**, 580-585 (1994).
- 575 27. Kozikowski, A.P., Ma, D., Du, L., Lewin, N.E. & Bumberg, P.M. Effect of alteration of the heterocyclic  
576 nucleus of ILV on its isoform selectivity for PKC. Palladium catalyzed route to benzofuran analogues  
577 of ILV. *Farmaco* **50**, 425-430 (1995).
- 578 28. Steinberg, S.F. Structural basis of protein kinase C isoform function. *Physiol Rev* **88**, 1341-1378  
579 (2008).
- 580 29. Wu-Zhang, A.X. & Newton, A.C. Protein kinase C pharmacology: refining the toolbox. *Biochem J*  
581 **452**, 195-209 (2013).
- 582 30. Martiny-Baron, G. et al. Selective inhibition of protein kinase C isozymes by the indolocarbazole Gö  
583 6976. *J Biol Chem* **268**, 9194-9197 (1993).
- 584 31. Kilpinen, H. et al. Common genetic variation drives molecular heterogeneity in human iPSCs. *Nature*  
585 **546**, 370-375 (2017).
- 586 32. Yamada, K.M. & Cukierman, E. Modeling tissue morphogenesis and cancer in 3D. *Cell* **130**, 601-610  
587 (2007).
- 588 33. Ghule, P.N. et al. Reprogramming the pluripotent cell cycle: restoration of an abbreviated G1 phase  
589 in human induced pluripotent stem (iPS) cells. *J Cell Physiol* **226**, 1149-1156 (2011).
- 590 34. Abujarour, R. et al. Optimized surface markers for the prospective isolation of high-quality hiPSCs  
591 using flow cytometry selection. *Sci Rep* **3**, 1179 (2013).
- 592 35. Zhu, G. et al. 12-O-Tetradecanoylphorbol-13-acetate (TPA) is anti-tumorigenic in liver cancer cells  
593 via inhibiting YAP through AMOT. *Sci Rep* **7**, 44940 (2017).
- 594 36. Irie, K. et al. Biological activities and cellular uptake studies of fluorescent derivatives of indole  
595 alkaloid tumor promoter teleocidin. *Int J Cancer* **43**, 513-519 (1989).
- 596 37. Irie, K., Nakagawa, Y. & Ohigashi, H. Toward the development of new medicinal leads with  
597 selectivity for protein kinase C isozymes. *Chem Rec* **5**, 185-195 (2005).
- 598 38. Freeley, M., Kelleher, D. & Long, A. Regulation of Protein Kinase C function by phosphorylation on  
599 conserved and non-conserved sites. *Cell Signal* **23**, 753-762 (2011).
- 600 39. Akoyev, V. & Takemoto, D.J. ZO-1 is required for protein kinase C gamma-driven disassembly of  
601 connexin 43. *Cell Signal* **19**, 958-967 (2007).
- 602 40. Imamdi, R., de Grauw, M. & van de Water, B. Protein kinase C mediates cisplatin-induced loss of  
603 adherens junctions followed by apoptosis of renal proximal tubular epithelial cells. *J Pharmacol Exp*  
604 *Ther* **311**, 892-903 (2004).
- 605 41. D'Souza, T., Indig, F.E. & Morin, P.J. Phosphorylation of claudin-4 by PKCepsilon regulates tight  
606 junction barrier function in ovarian cancer cells. *Exp Cell Res* **313**, 3364-3375 (2007).

- 607 42. Jain, K. & Basu, A. The Multifunctional Protein Kinase C- $\epsilon$  in Cancer Development and Progression. *Cancers (Basel)* **6**, 860-878 (2014).  
608  
609 43. Singh, R., Lei, P. & Andreadis, S.T. PKC-delta binds to E-cadherin and mediates EGF-induced cell  
610 scattering. *Exp Cell Res* **315**, 2899-2913 (2009).  
611 44. Oh, M.A. et al. PKCdelta and cofilin activation affects peripheral actin reorganization and cell-cell  
612 contact in cells expressing integrin alpha5 but not its tailless mutant. *J Cell Sci* **120**, 2717-2730  
613 (2007).  
614 45. Provost, E. & Rimm, D.L. Controversies at the cytoplasmic face of the cadherin-based adhesion  
615 complex. *Curr Opin Cell Biol* **11**, 567-572 (1999).  
616 46. van Roy, F. & Berx, G. The cell-cell adhesion molecule E-cadherin. *Cell Mol Life Sci* **65**, 3756-3788  
617 (2008).  
618 47. Gwak, J. et al. Protein-kinase-C-mediated beta-catenin phosphorylation negatively regulates the  
619 Wnt/beta-catenin pathway. *J Cell Sci* **119**, 4702-4709 (2006).  
620 48. Awadelkarim, K.D. et al. Quantification of PKC family genes in sporadic breast cancer by qRT-PCR:  
621 evidence that PKC $\lambda$  overexpression is an independent prognostic factor. *Int J Cancer* **131**, 2852-  
622 2862 (2012).  
623 49. Labernadie, A. et al. A mechanically active heterotypic E-cadherin/N-cadherin adhesion enables  
624 fibroblasts to drive cancer cell invasion. *Nat Cell Biol* **19**, 224-237 (2017).  
625 50. Livak, K.J. & Schmittgen, T.D. Analysis of relative gene expression data using real-time quantitative  
626 PCR and the 2<sup>(-Delta Delta C(T))</sup> Method. *Methods* **25**, 402-408 (2001).

627

## 628 **Figures legends**

### 629 **Figure 1. Phenotypic changes in iPSC induced by (-)-ILV and OXS8360 at 1 $\mu$ M.**

630 **(a)** Chemical structure of (-)-ILV and OXS8360. **(b)** Phase contrast images of (-)-ILV or OXS8360-treated iPSC  
631 at 3h, 12h and 24h. Colony disruption is observed 3h *post* treatment onwards. **(c)** Reversibility of the  
632 phenotypic effect induced by (-)-ILV and OXS8360. iPSC were plated with 10 $\mu$ M Rho-kinase inhibitor Y-27623  
633 (upper panel) then treated for a subsequent 24h with (-)-ILV (left, middle panel) and OXS8360 (right, middle  
634 panel), then compounds were washed off (lower panel). **(d)** Effects of (-)-ILV and OXS8360 on cell density,  
635 nuclei area, perimeter, height, geometric mean forward scatter and actin cytoskeleton signal intensity. To  
636 determine nuclei area and perimeter, cells were fixed then stained with Hoechst for confocal microscopy  
637 analysis. To determine the nuclei height, z-stacks were imaged. Three images of different locations per  
638 condition were analysed with CellProfiler software. Statistical analysis was done using a One-way Anova with  
639 Dunett's multiple comparison test. Error bars represent SEM. \*P<0.05, \*\*P<0.01, \*\*\*\*P<0.0001. **(d)**  
640 Immunofluorescence staining for actin filaments (green) and nuclei (Hoechst, red), showing cytoskeleton  
641 remodelling upon treatment with (-)-ILV or OXS8360. Scale bars, 100 $\mu$ m.

642

### 643 **Figure 2. Assessing the proliferation capacity of OXS8360-treated iPSC through the expression of KI-67.**



644 (a) Immunofluorescence staining for KI-67 (red) shows a similar fraction of actively cycling cells in untreated  
645 versus iPSC treated with OXS8360 for three passages. Human dermal fibroblasts (HDF) serve as a slowly-  
646 proliferating comparison, with low KI-67 staining. Right hand panel, secondary antibody-only staining control.  
647 Scale bars, 50  $\mu$ m. (b) Representative flow cytometry plots of KI-67<sup>+</sup> cells. Black line and grey filled plots  
648 represent KI-67 stained population and negative control respectively. Debris and dead cells are gated out.  
649 Positive gate is set where negative control  $\leq 1\%$ . (c) Histograms for KI-67 positive populations in OXS8360-  
650 treated iPSC (mean $\pm$ SEM: 99.4 $\pm$ 0.05; n=3), DMSO-treated iPSC (mean $\pm$ SEM: 99.0 $\pm$ 0.12; n=3) and HDF  
651 (mean $\pm$ SEM: 12.3 $\pm$ 0.03; n=3).

652

653 **Figure 3. Assessing pluripotency signatures of OXS8360 treated iPSC.**

654 (a) Phenotypes of iPSC treated with DMSO or OXS8360, and HDF. Expression of the pluripotency markers  
655 Nanog, Tra-1-60, SSEA-3 and SSEA-4 and the fibroblast marker CD44 were measured by flow cytometry. The  
656 same gate to select for live cells was applied to all conditions. Histograms show antibody stained cells (black  
657 line plot) and relevant isotype control-stained cells (solid grey plot). (b) Immunocytochemistry staining  
658 showing expression of pluripotency markers Nanog and Tra-1-60 in untreated and OXS8360-treated iPSC.  
659 iPSC were treated over 3 passages with OXS8360 or DMSO followed by a 3 day culture without any compound  
660 prior to staining. Scale bar, 100 $\mu$ m. (c) Heat map groups genes according to signatures for pluripotency and  
661 trilineage differentiation for the 4 samples: (1) DMSO-treated undifferentiated, (2) OXS8360 treated for 3  
662 passages undifferentiated, (3) DMSO treated then differentiated for 14 days, (4) OXS8360 treated then  
663 differentiated for 14 days. Each sample is normalised to a reference set of undifferentiated samples provided  
664 via the online software of the ScoreCard<sup>TM</sup> kit. Colour-coding indicates whether a gene is upregulated (red,  
665  $\geq 2$ ), downregulated (blue,  $< 0.5$ ) or expressed at the same level (white,  $\geq 0.5$  and  $< 2$ ). (d) Box-and-whiskers  
666 plots indicate the reference signatures of undifferentiated samples as provided by the ScoreCard kit. 4  
667 algorithm scores determine whether a sample is overall negative or positive for an entire differentiation or  
668 pluripotency signature. Algorithm scores  $\geq 2$  indicate upregulation,  $< 0.5$  downregulation and scores  $\geq 0.5$  and  
669  $< 2$  are highly similar to a reference set of undifferentiated pluripotent stem cells. (e) Dots represent the  
670 algorithm scores of the included samples for each signature: DMSO-treated undifferentiated (black),

671 OXS8360-treated undifferentiated (red), DMSO-treated and differentiated for 14 days (green), OXS8360-  
672 treated and differentiated for 14 days (blue).

673  
674 **Figure 4. Assessing functional pluripotency through directed differentiation.**

675 (a) Morphological phenotypes of macrophages derived from DMSO and OXS8360-treated iPSC analysed using  
676 phase contrast microscopy. Shown are adherent macrophages (pMac) on day 40 of differentiation along the  
677 myeloid pathway. Scale bars, 100 $\mu$ m. (b) Flow cytometry showing the expression of CD11b, CD14 (both  
678 macrophage markers) and CD45 (pan-hematopoietic marker) at day 40 of differentiation. The same gate to  
679 select for live cells was applied to each condition. Histograms in each plot represent a population stained  
680 with the conjugated antibodies (black line plot) compared to its relevant isotype control (grey filled plot). (c)  
681 Differentiation of OXS8360 treated iPSC into cortical neurons. Phase contrast images of DMSO and OXS8360-  
682 treated iPSC on days 16 and 27. Scale bars, 50 $\mu$ m. (d) Immunocytochemistry staining for early neural markers  
683 PAX-6 and TUJ1 in cortical neuron cultures derived from DMSO and OXS8360-treated iPSC on day 25. Scale  
684 bars = 50 $\mu$ m.

685  
686 **Figure 5. 3D static suspension culture of iPSC.**

687 Cell-aggregation assay. Single iPSC were cultured for 10 passages with or without OXS8360 in static  
688 suspension culture in mTeSR and Rho-kinase inhibitor Y-27623 at a seeding density on each 4<sup>th</sup> day passage  
689 of  $1 \times 10^6$  cells/mL. (a) Cell morphology on day 4 after the 10<sup>th</sup> passage (phase contrast) shows smaller  
690 aggregates in presence of OXS8360 versus DMSO. Scale bar, 100 $\mu$ m. (b) Flow cytometry for Nanog and Tra1-  
691 60 in untreated and OXS8360-treated cells at passage 10. (c) Mean cross sectional area of the aggregates was  
692 determined with FIJI ImageJ. Note the formation of more homogenous aggregates in the presence of  
693 OXS8360 versus DMSO as indicated by error bars. (d) Cell dissociation assay. Aggregates were centrifuged,  
694 TrypLE-dissociated and resuspended in culture medium. Cell dissociation index is expressed as the percentage  
695 of particles (cell clusters  $\geq 4$  cells) in total number of cells per well. Note the presence of fewer cell clusters

696 following iPSC culture in the presence of OXS8360. Values are mean±SEM from three independent  
697 experiments. Statistical analysis was done using an unpaired t-test, \*\*\*P<0.001, \*\*\*\*P<0.0001.

698

699 **Figure 6 Mechanism of action of OXS8360.**

700 (a) Immunofluorescence staining for actin filaments (green), intracellular (antibody clone 36, red) and  
701 extracellular E-cadherin (antibody SHE78-7, red) in DMSO and OXS8360-treated iPSC. Nuclei were  
702 counterstained with Hoescht (blue). Cells were seeded overnight on  $\mu$ -slides before being treated for 24h  
703 with or without OXS8360. Scale bar, 100 $\mu$ m. (b) Release of soluble E-Cadherin from cultured hiPSCs under  
704 OXS8360 and EDTA conditions. Monolayers of iPSC were cultured 24h prior to treatment. Statistical analysis  
705 was done using a one-way ANOVA with Dunnett's multiple comparison test, \*\*\*P<0.001, \*\*\*\*P<0.0001, n=3.  
706 (c) PKC isoform expression in iPSC line OX1-18 upon treatment with OXS8360. qRT-PCR was performed to  
707 determine the relative expression levels of PKC isoforms normalised to TBP. iPSC were treated for 72h with  
708 OXS8360. All PKC isoforms are expressed in both treated and untreated samples. A significant difference  
709 could only be observed for the expression of PKC  $\delta$ . Statistical analysis was done using a one-way ANOVA  
710 with Sidak's multiple comparison test, ns P>0.05, \*P<0.05, n=3. (d) Active PKC protein levels in iPSC following  
711 treatment with PMA, OXS8360 and/or PKC inhibitors (C1 and Sphingosine (Sp)). Cells from PMA or OXS8360  
712 treatment group alone were homogenised prior to co-treatment with PKC inhibitors. Statistical analysis was  
713 done using a one-way ANOVA with Dunnett's multiple comparison test, ns P>0.05, \*P<0.05, n=3. (e) Phase  
714 contrast images of iPSC treated with 1  $\mu$ M OXS8360. After 24h, the medium was changed and the treatment  
715 was continued either in a combinatorial approach with the PKC inhibitors Gö6976 and Gö6983 (both at 1  $\mu$ M)  
716 either with OXS8360 (positive control) or medium alone (negative control). iPSC treated with OXS8360 and  
717 the PKC inhibitor Gö6983 displayed colony-based morphology. Co-treatment with Gö6976 did not abrogate  
718 the colony-spread phenotype. Scale bars, 100  $\mu$ m. (f) Chemical structures of PKC inhibitors Gö6976 ( $\alpha$ ,  $\beta$ ) and  
719 Gö6983 (pan-PKC) and OXS8360.

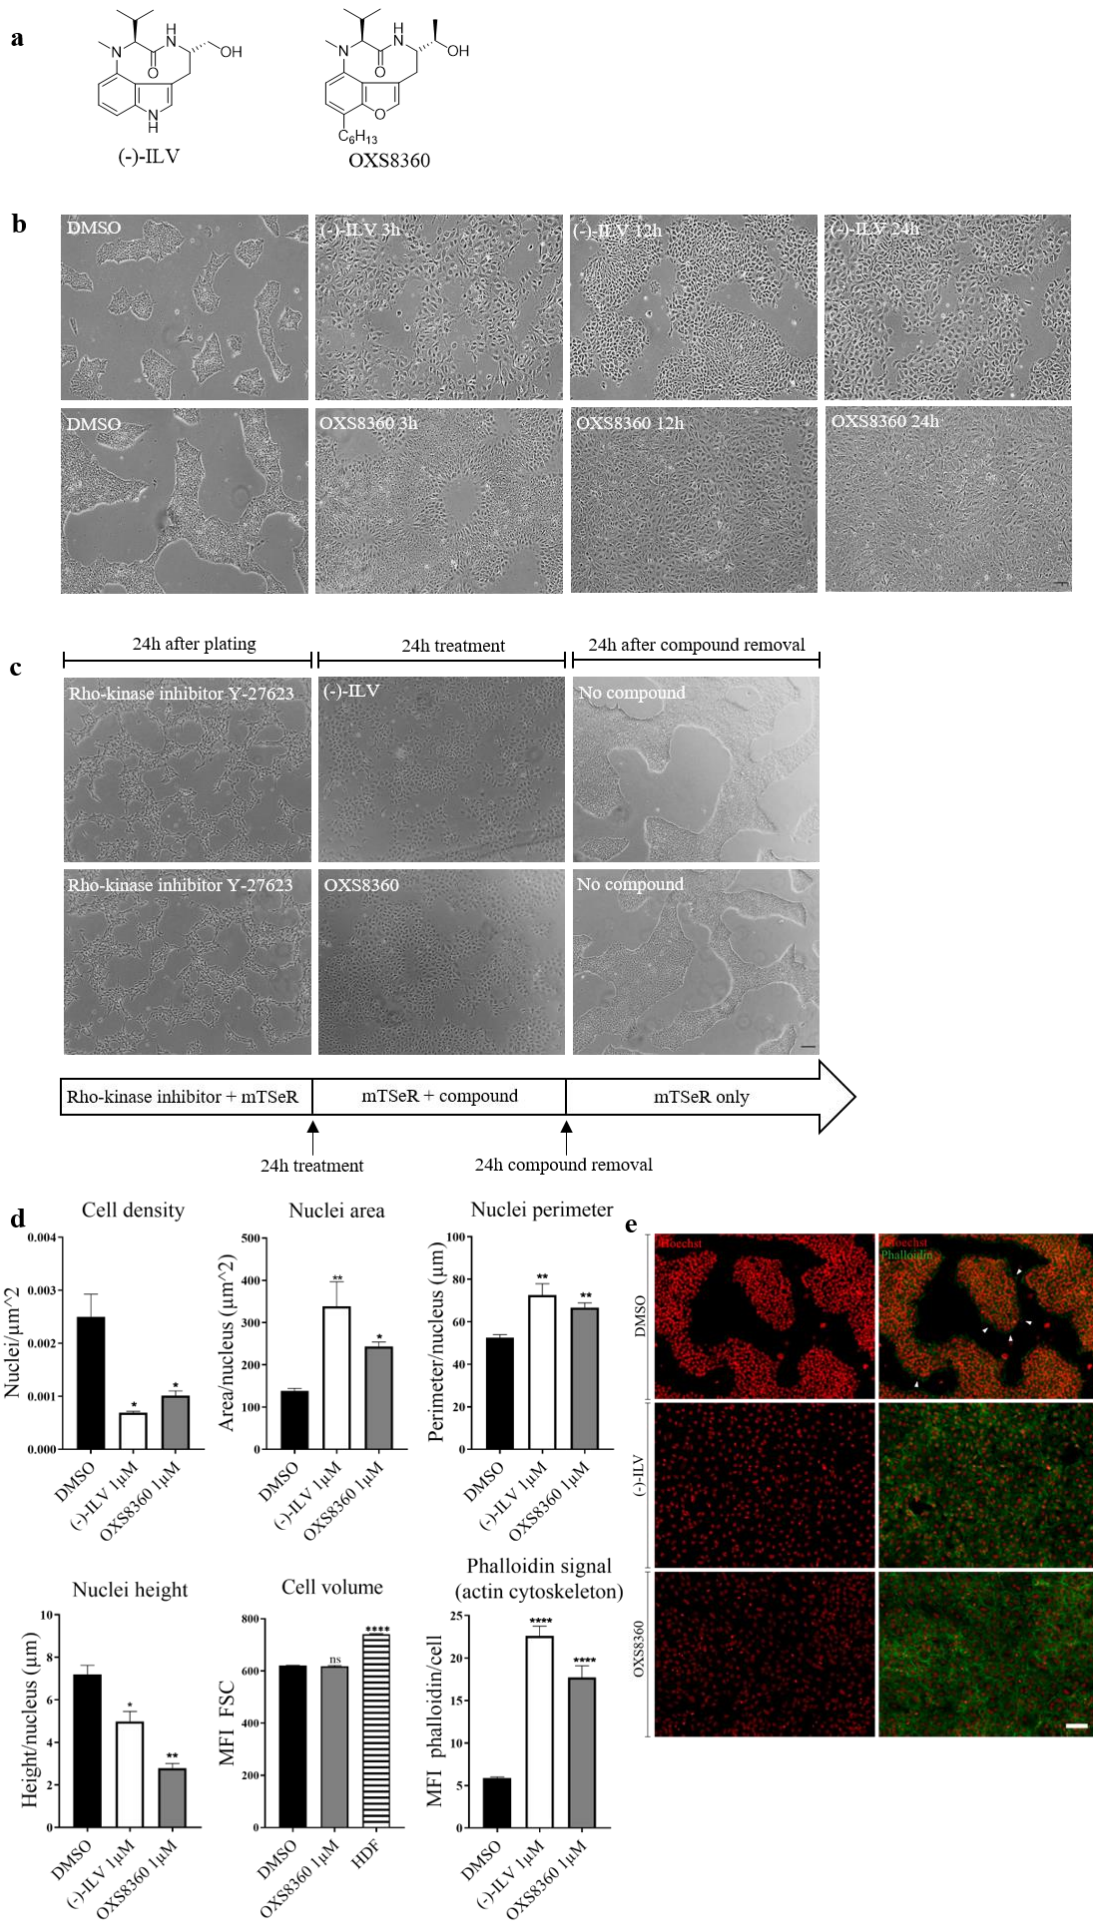

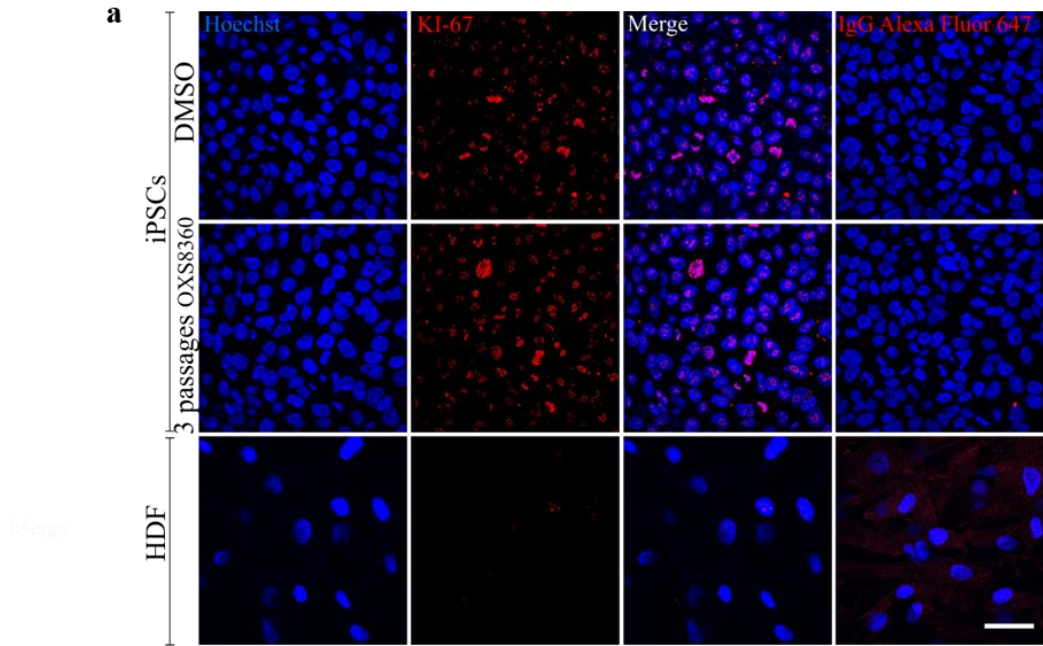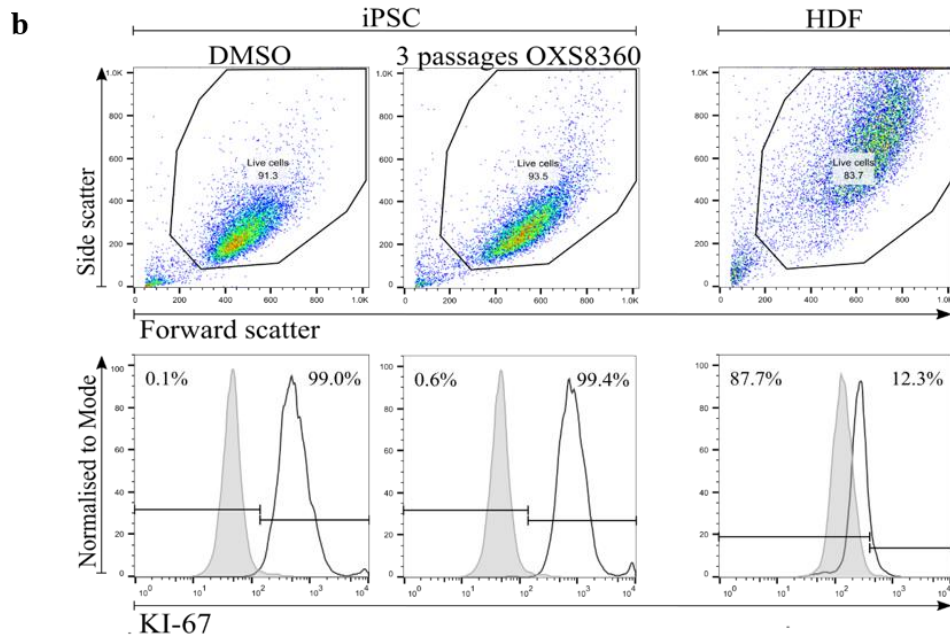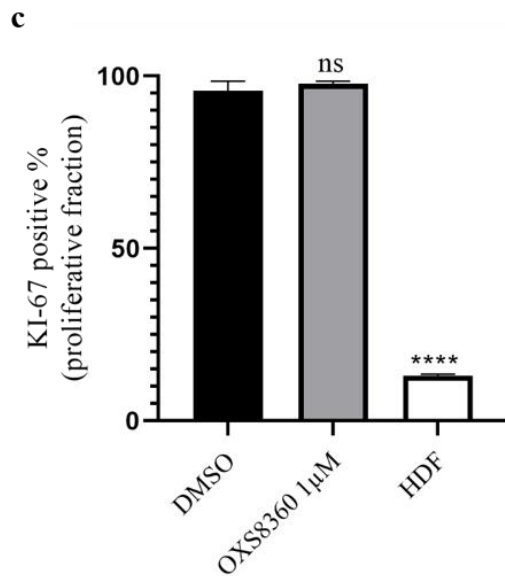



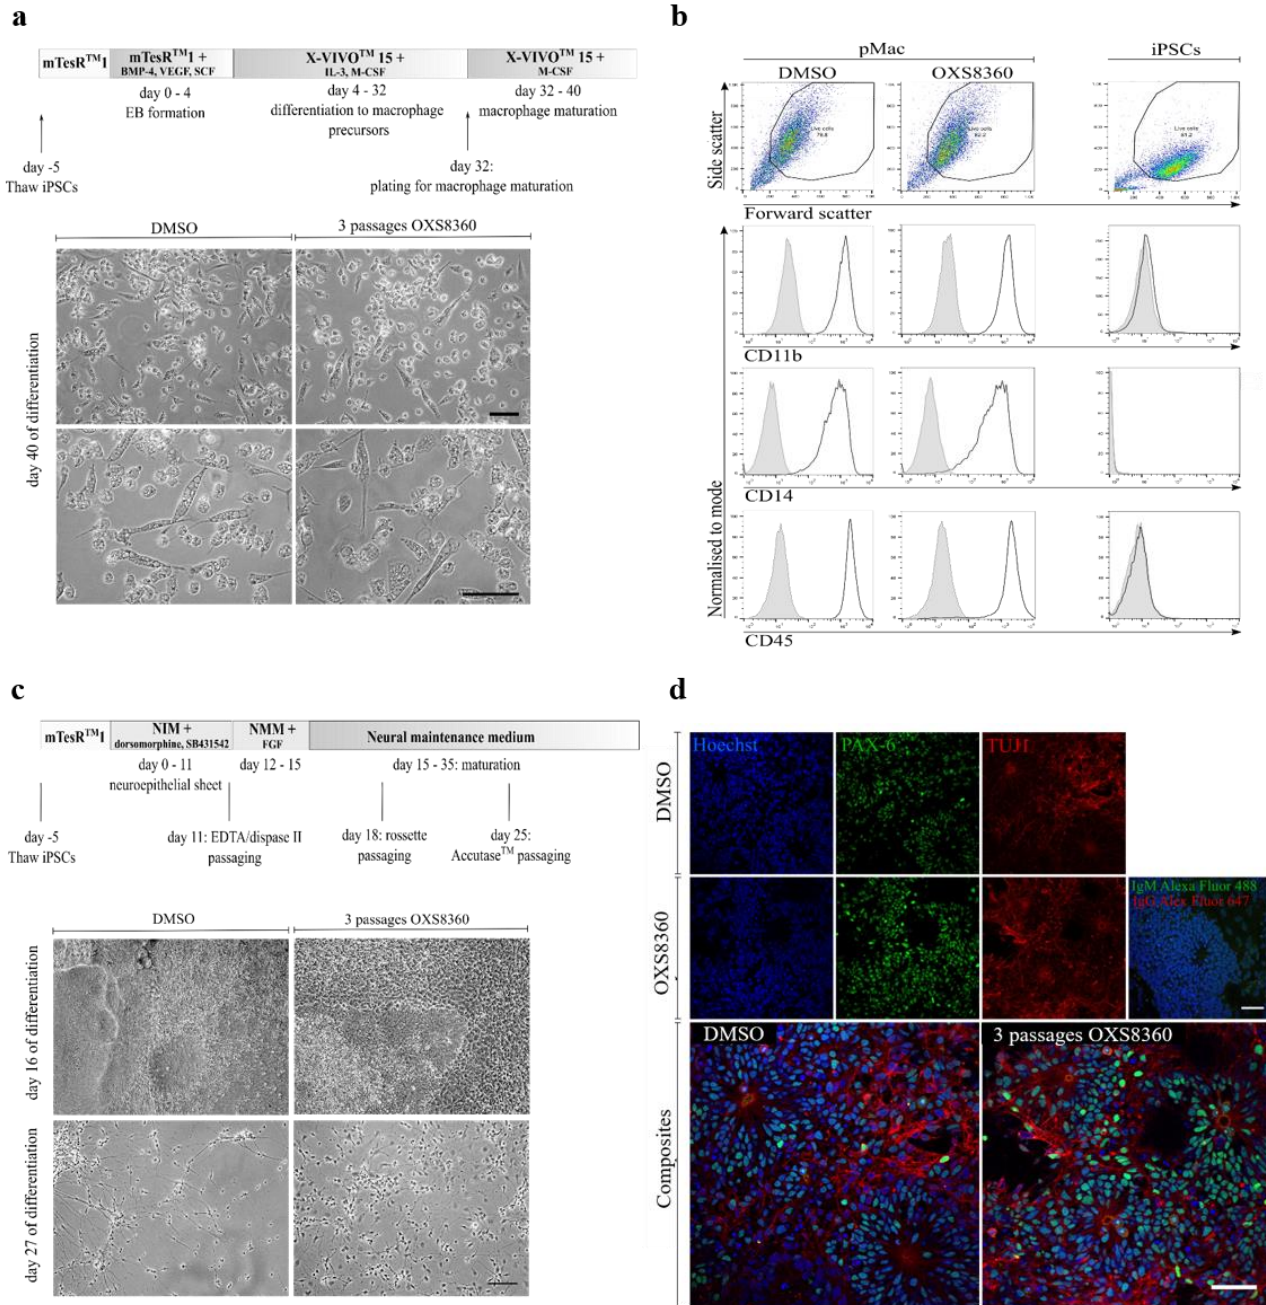

723

724

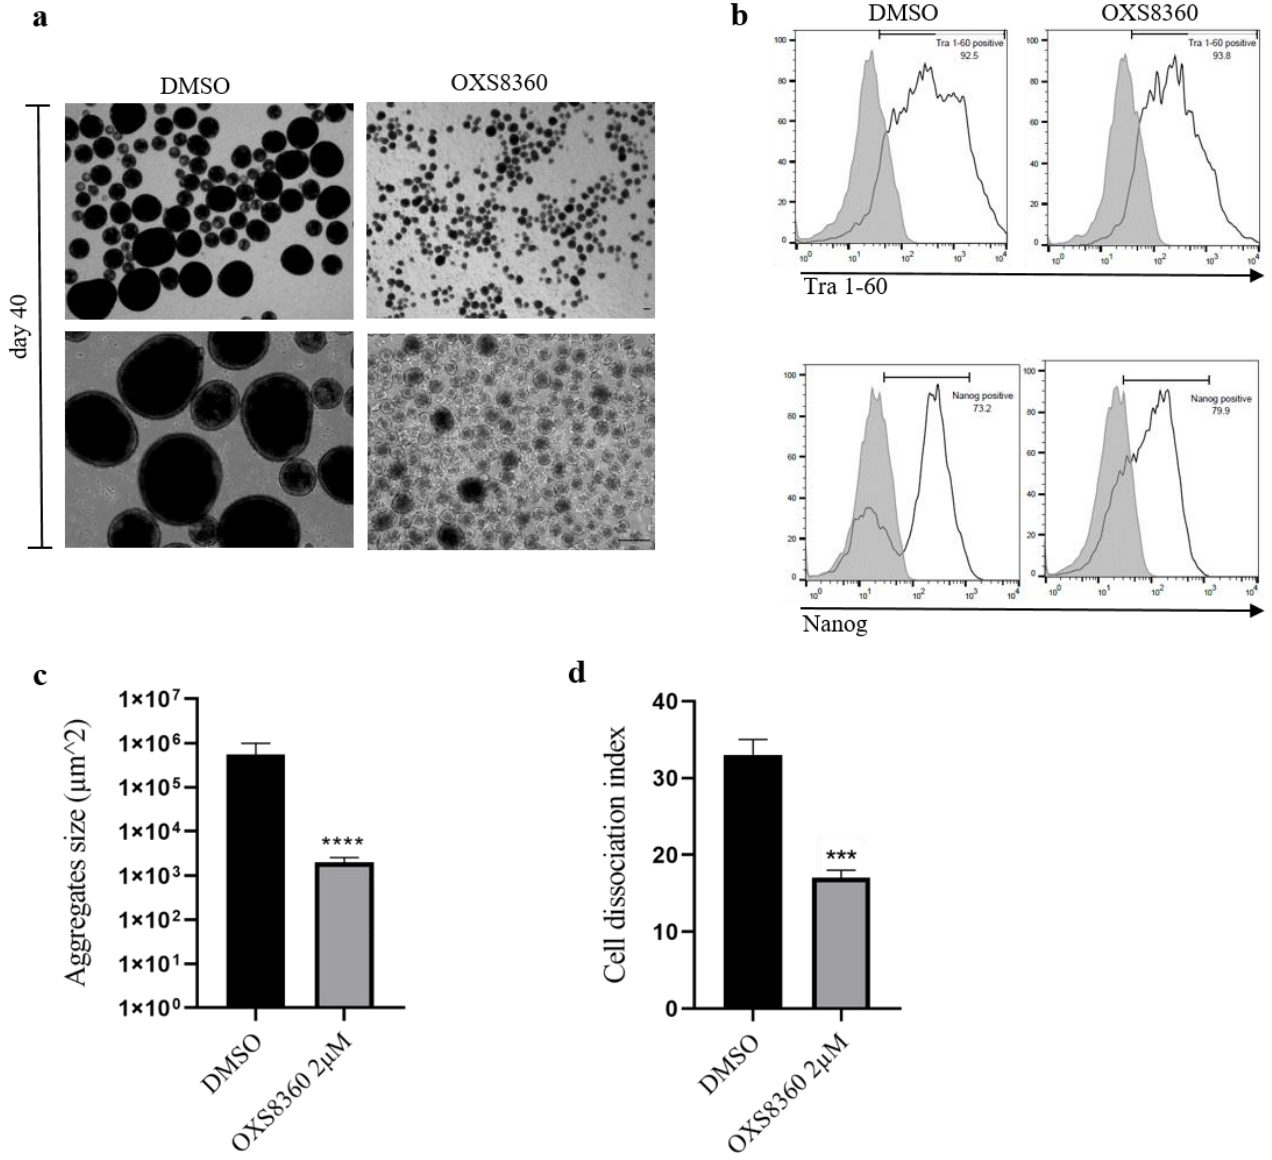

725  
726



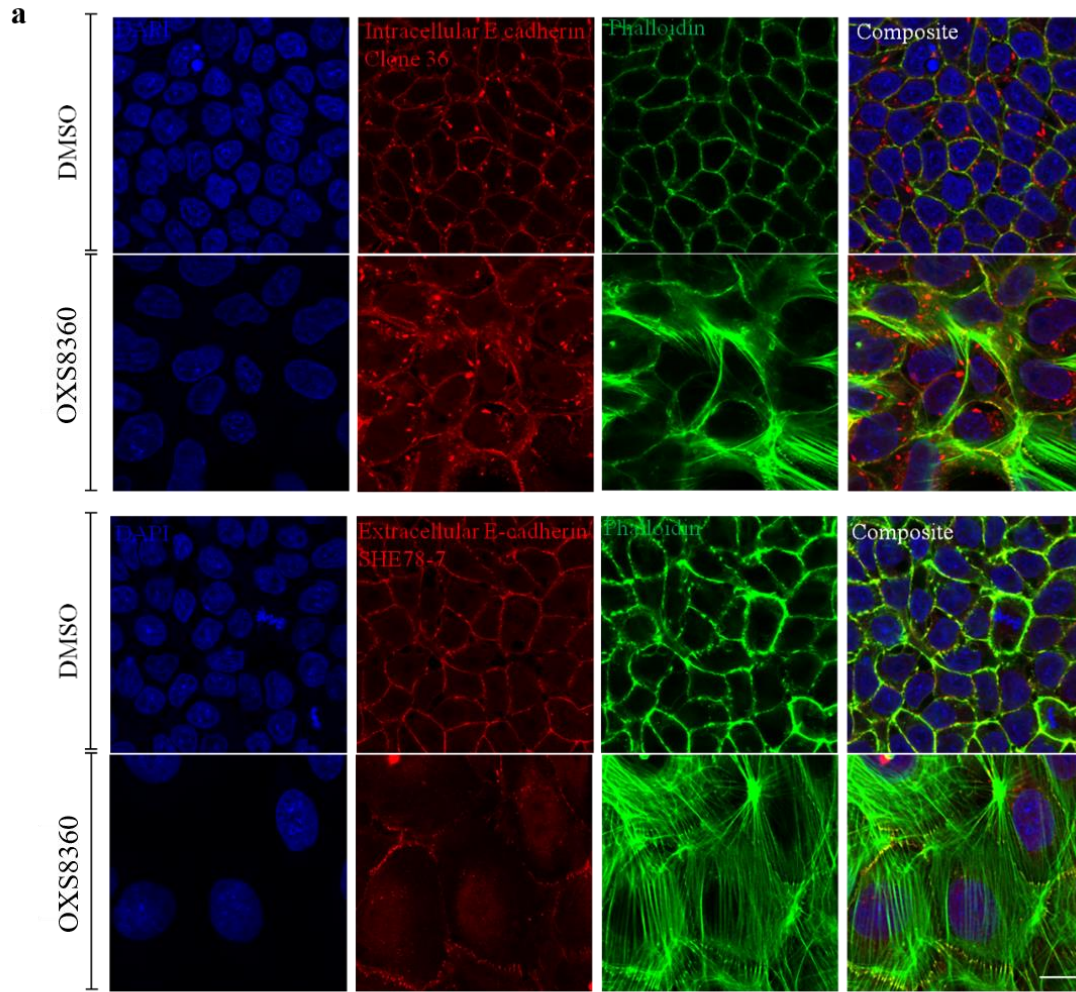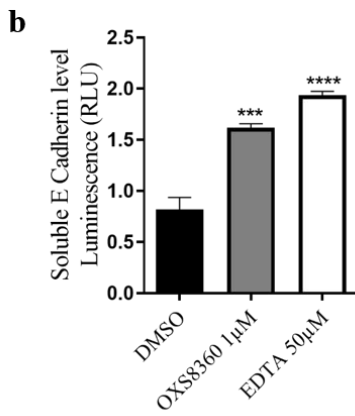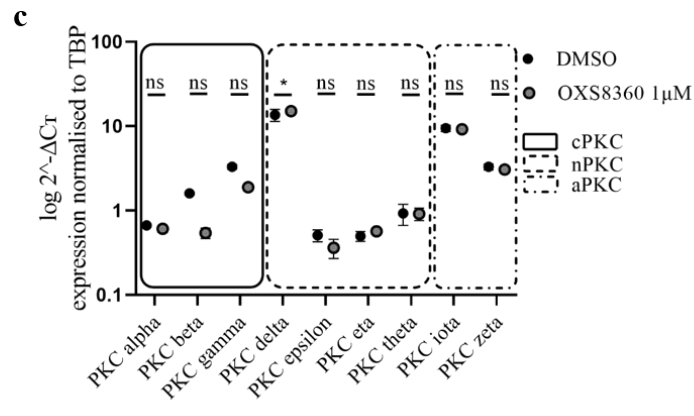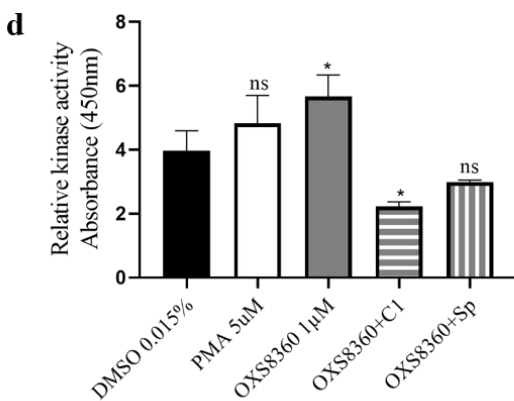

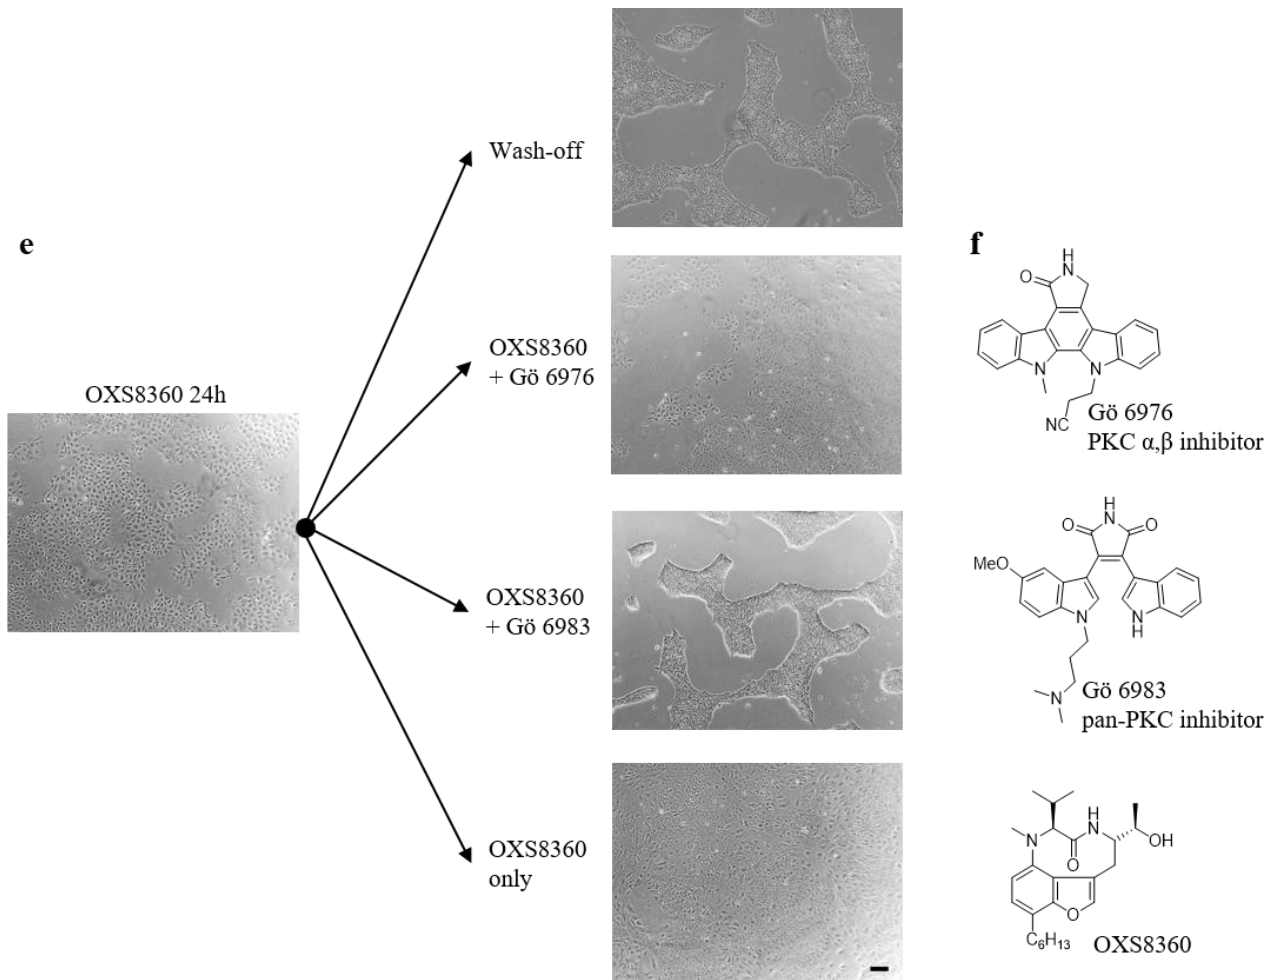

728  
729
